# Supplementary material for: Exploring the potential of ruthenium(ii)–phosphine–mercapto complexes as new anticancer agents
Source: Royal Society of Chemistry journal article supplement (doi:10.1039/d4dt01191k), 2024-01-01
Supplement: d4dt01191k1.pdf [file d4dt01191k1.pdf]

## *Supporting Information*

### **Exploring the Potential of Ruthenium(II)-Phosphine-Mercapto Complexes as New Anticancer Agents**

*Marcos V. Palmeira-Mello<sup>a,b</sup>, Analu R. Costa<sup>a</sup>, Leticia P. de Oliveira<sup>a</sup>, Olivier Blacque<sup>c</sup>,  
Gilles Gasser<sup>\*b</sup> and Alzir A. Batista<sup>\*a</sup>*

<sup>a</sup> Department of Chemistry, Universidade Federal de São Carlos, 13561-901, São Carlos, SP – Brazil.

<sup>b</sup> Chimie ParisTech, PSL University, CNRS, Institute of Chemistry for Life and Health Sciences, Paris – France.

<sup>c</sup> Department of Chemistry, University of Zurich, Winterthurerstrasse 190, 8057 Zurich, Switzerland.

\* Corresponding authors:

Gilles Gasser (ORCID Number 0000-0002-4244-5097) Email: [gilles.gasser@chimeparistech.psl.eu](mailto:gilles.gasser@chimeparistech.psl.eu), WWW: [www.gassergroup.com](http://www.gassergroup.com) and Alzir A. Batista (ORCID Number 0000-0002-4671-2754), Email: [daab@ufscar.br](mailto:daab@ufscar.br).

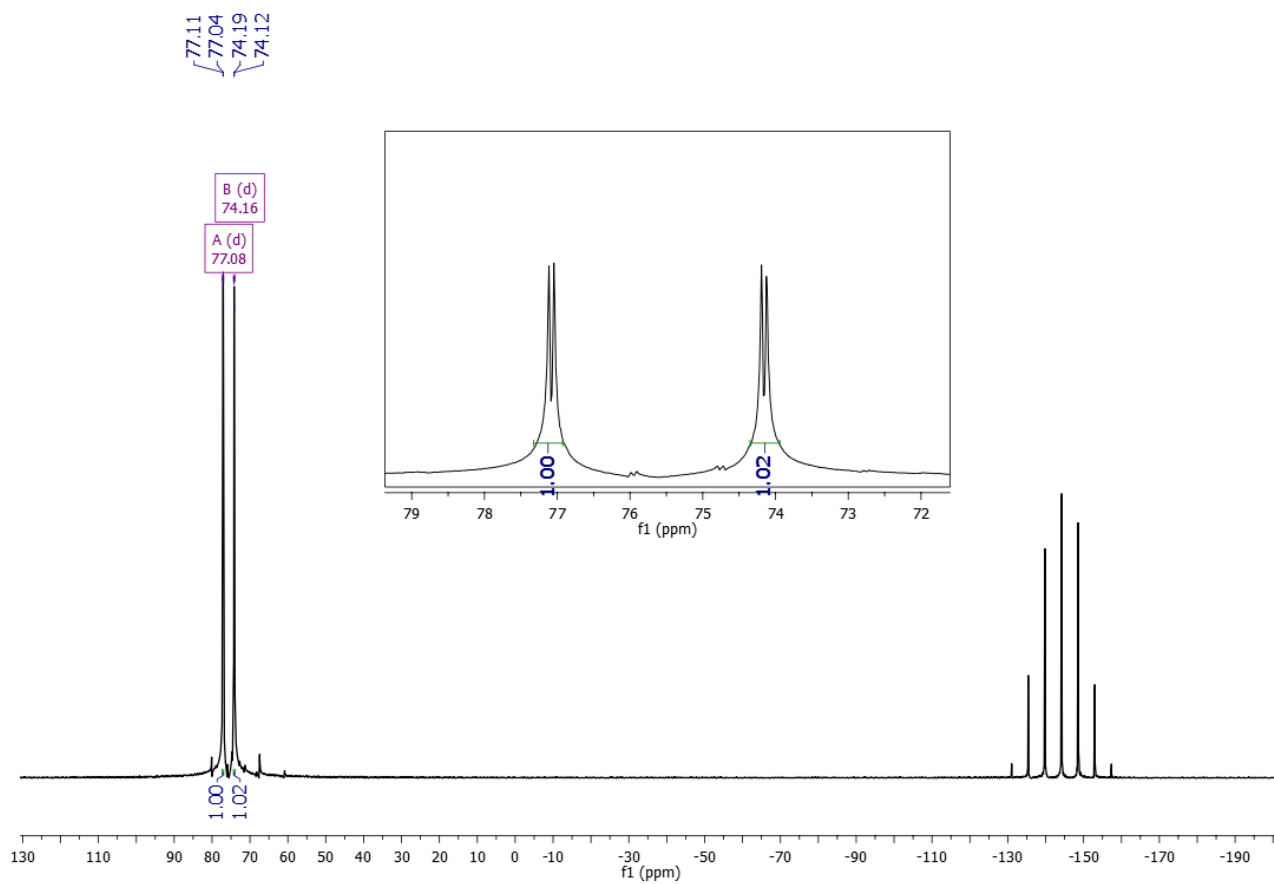

**Figure S1.**  $^{31}\text{P}\{^1\text{H}\}$  NMR spectrum of complex 1 in  $\text{DMSO-d}_6$ , 298 K.

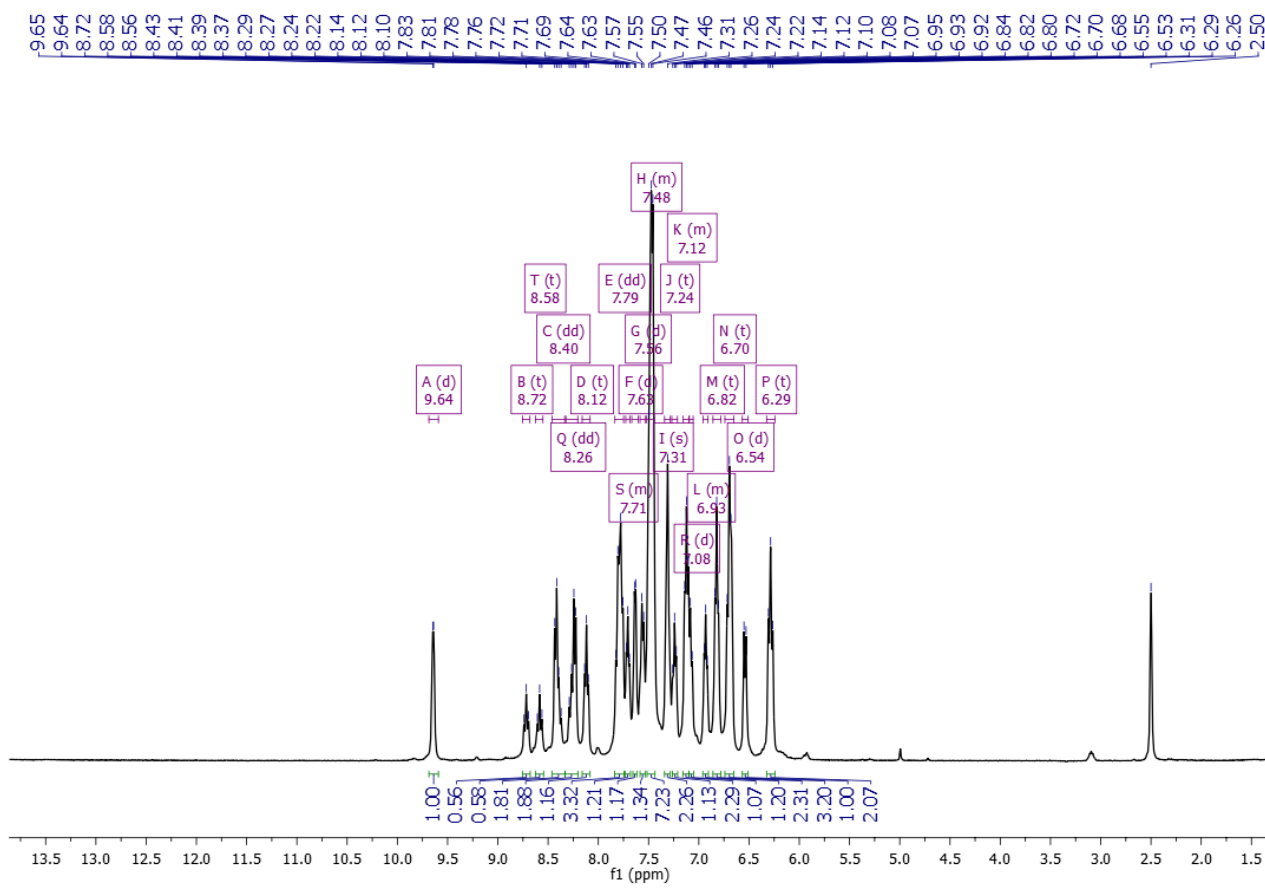

**Figure S2.**  $^1\text{H}$  NMR spectrum of complex **1** in  $\text{DMSO-d}_6$ , 298 K.

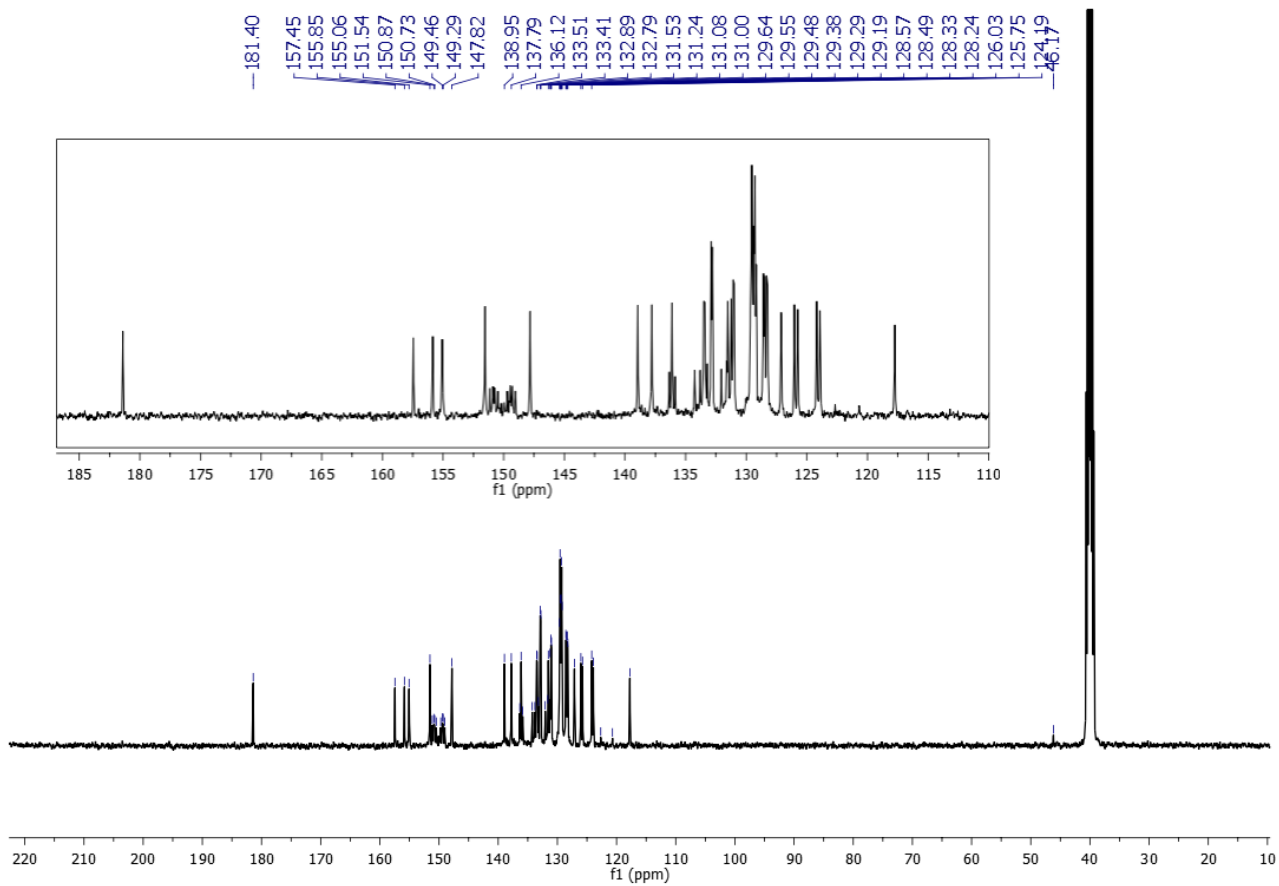

**Figure S3.**  $^{13}\text{C}$   $\{^1\text{H}\}$  NMR spectrum of complex 1 in  $\text{DMSO-d}_6$ , 298 K.

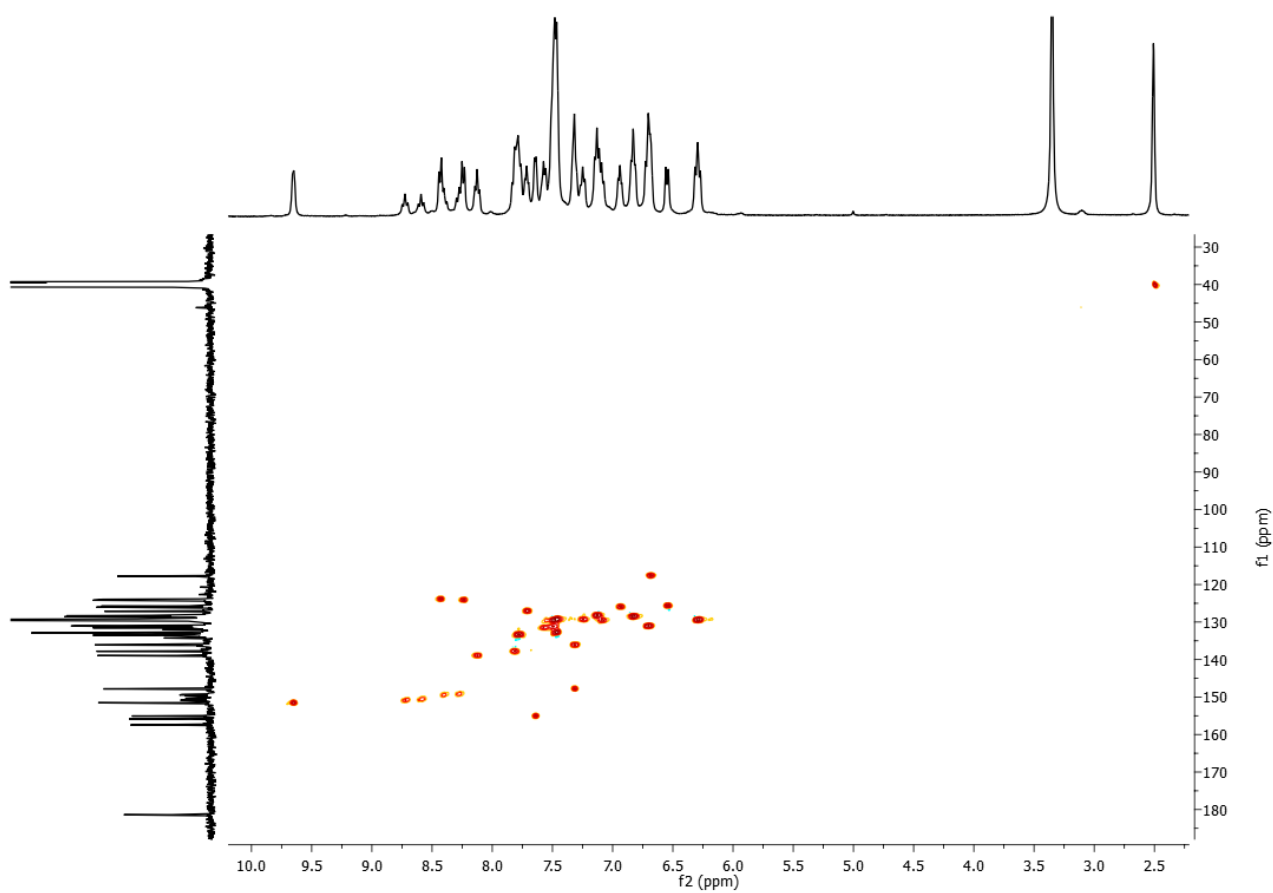

**Figure S4.**  $^1\text{H}$ - $^{13}\text{C}$  HSQC NMR correlation map of complex **1** in DMSO- $d_6$ , 298K.

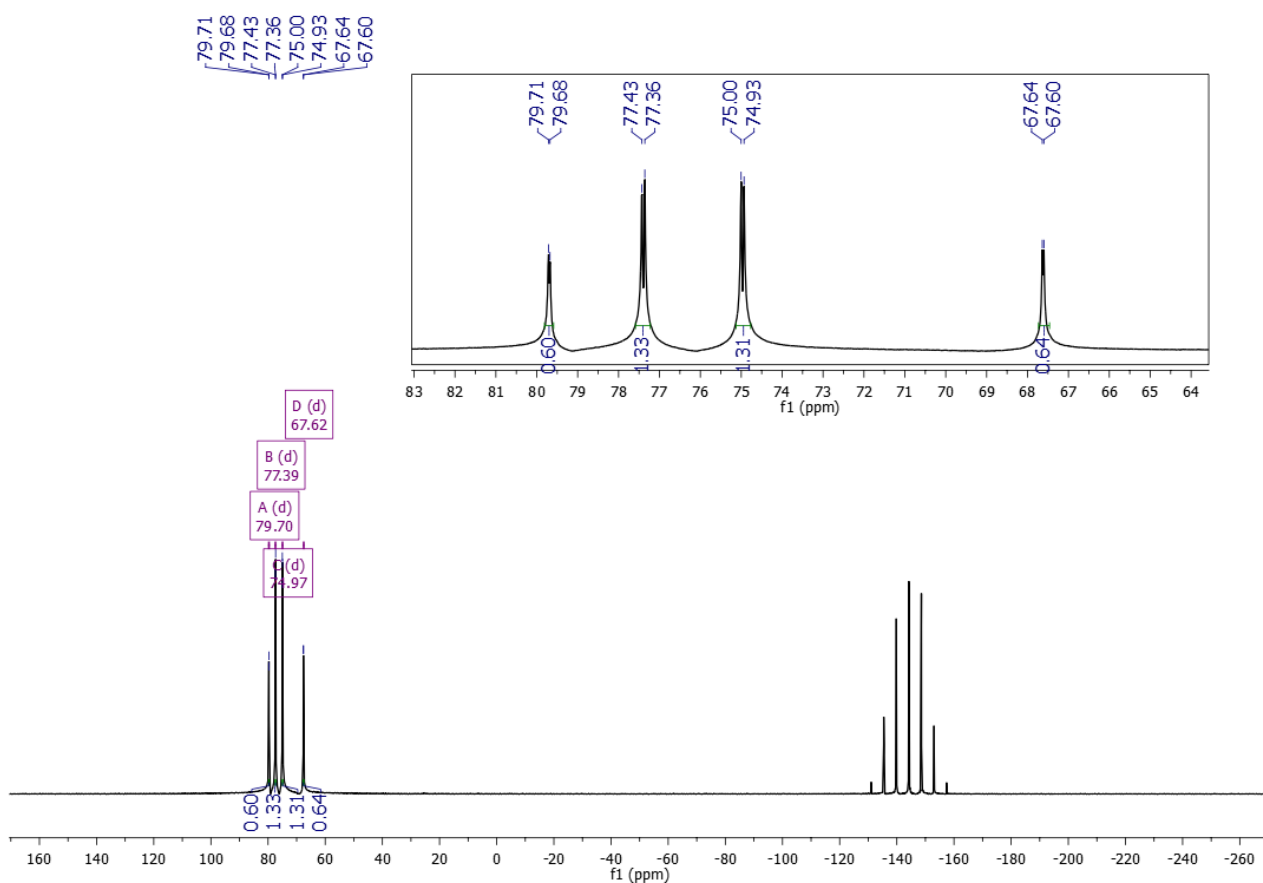

**Figure S5.**  $^{31}\text{P} \{^1\text{H}\}$  NMR spectrum of complex **2a/2b** in  $\text{DMSO-d}_6$ , 298 K.

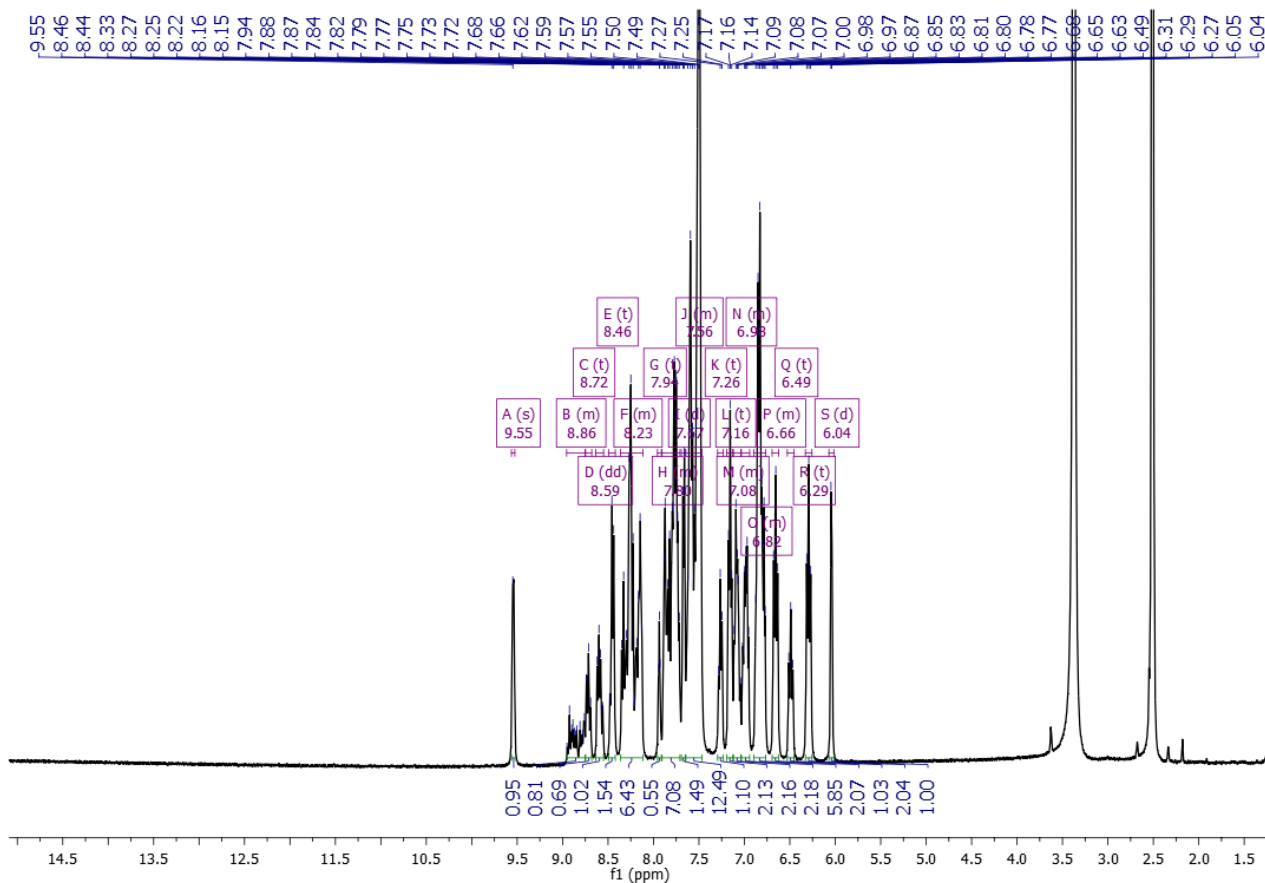

**Figure S6.**  $^1\text{H}$  NMR spectrum of complex **2a/2b** in  $\text{DMSO-d}_6$ , 298 K.

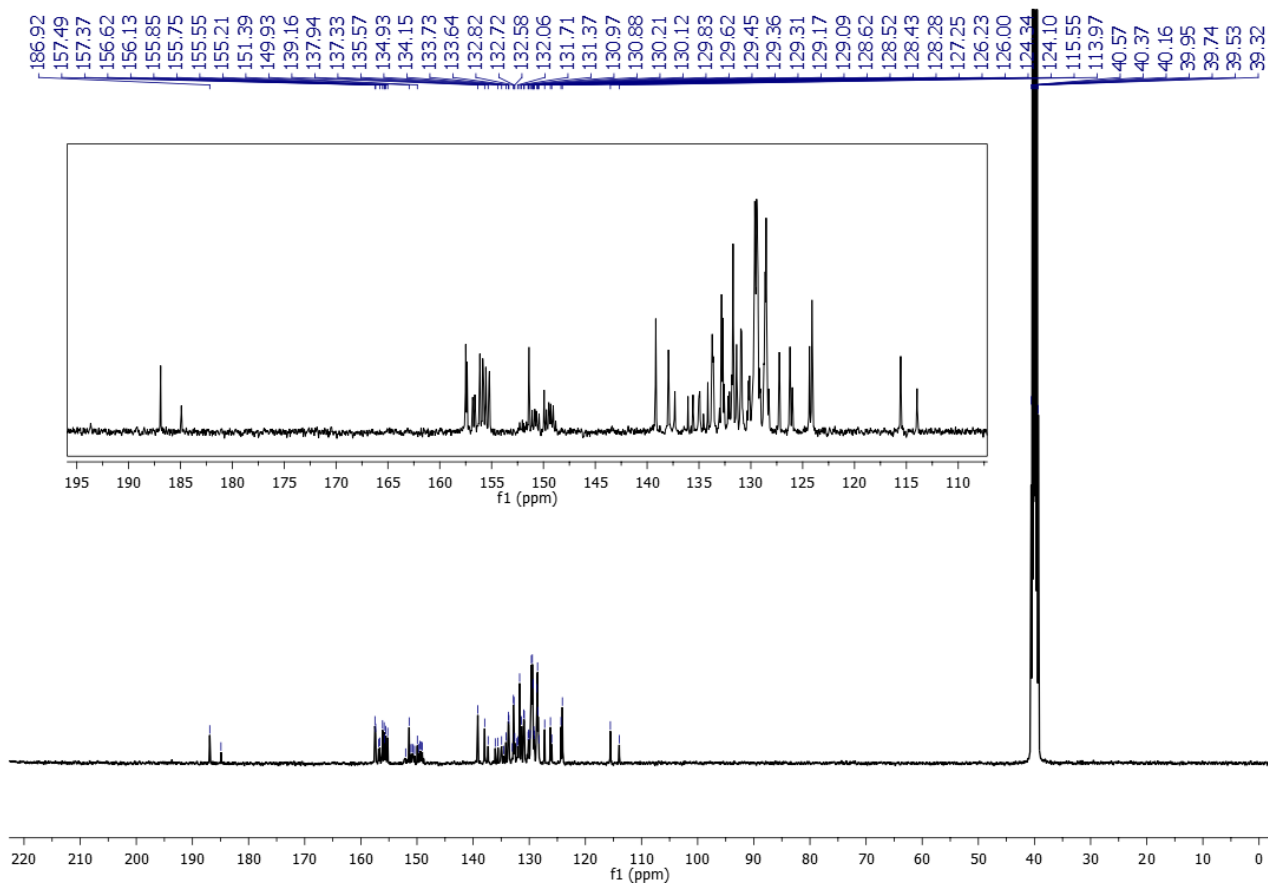

**Figure S7.**  $^{13}\text{C} \{^1\text{H}\}$  NMR spectrum of complex **2a/2b** in DMSO- $d_6$ , 298 K.



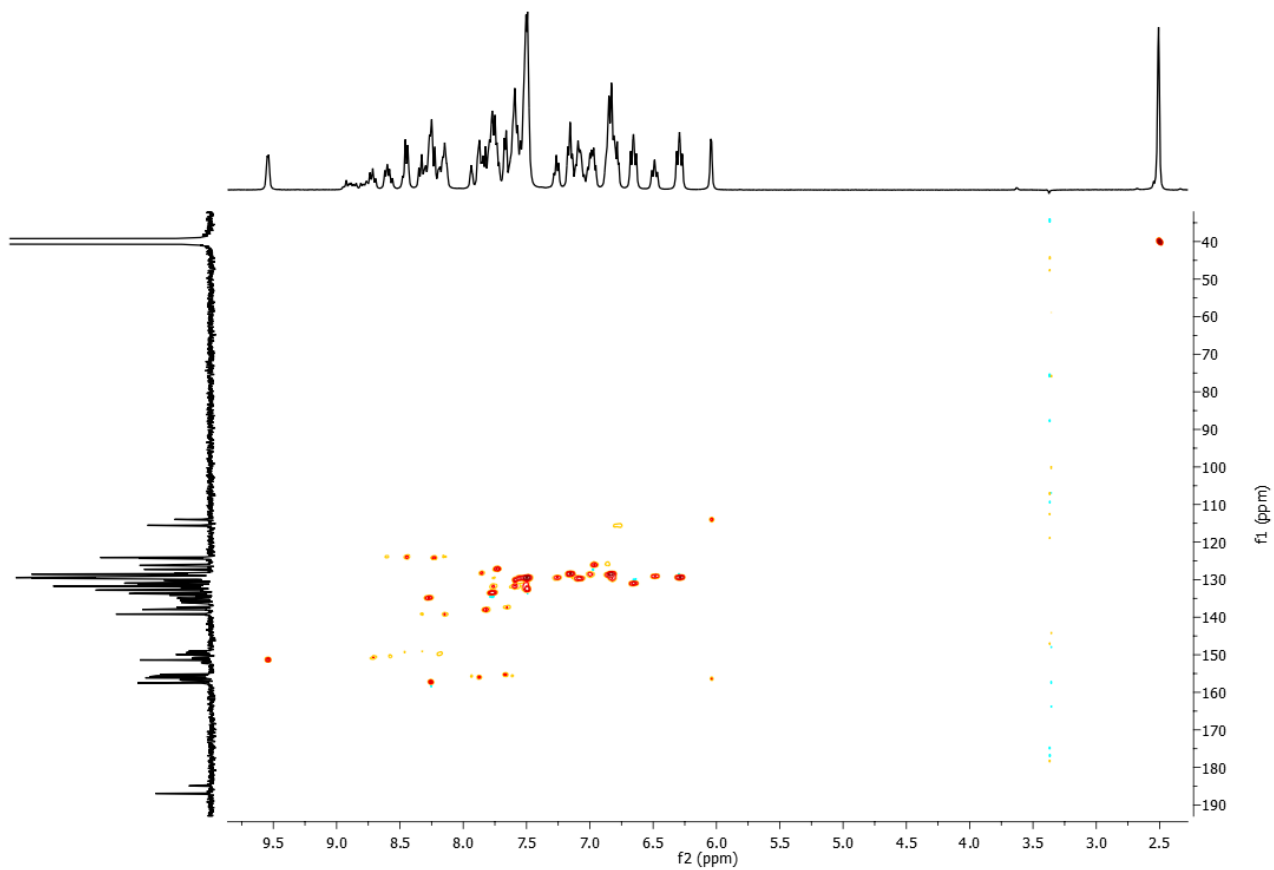

**Figure S8.**  $^1\text{H}$ - $^{13}\text{C}$  HSQC NMR correlation map of complex **2a/2b** in  $\text{DMSO-d}_6$ , 298K.

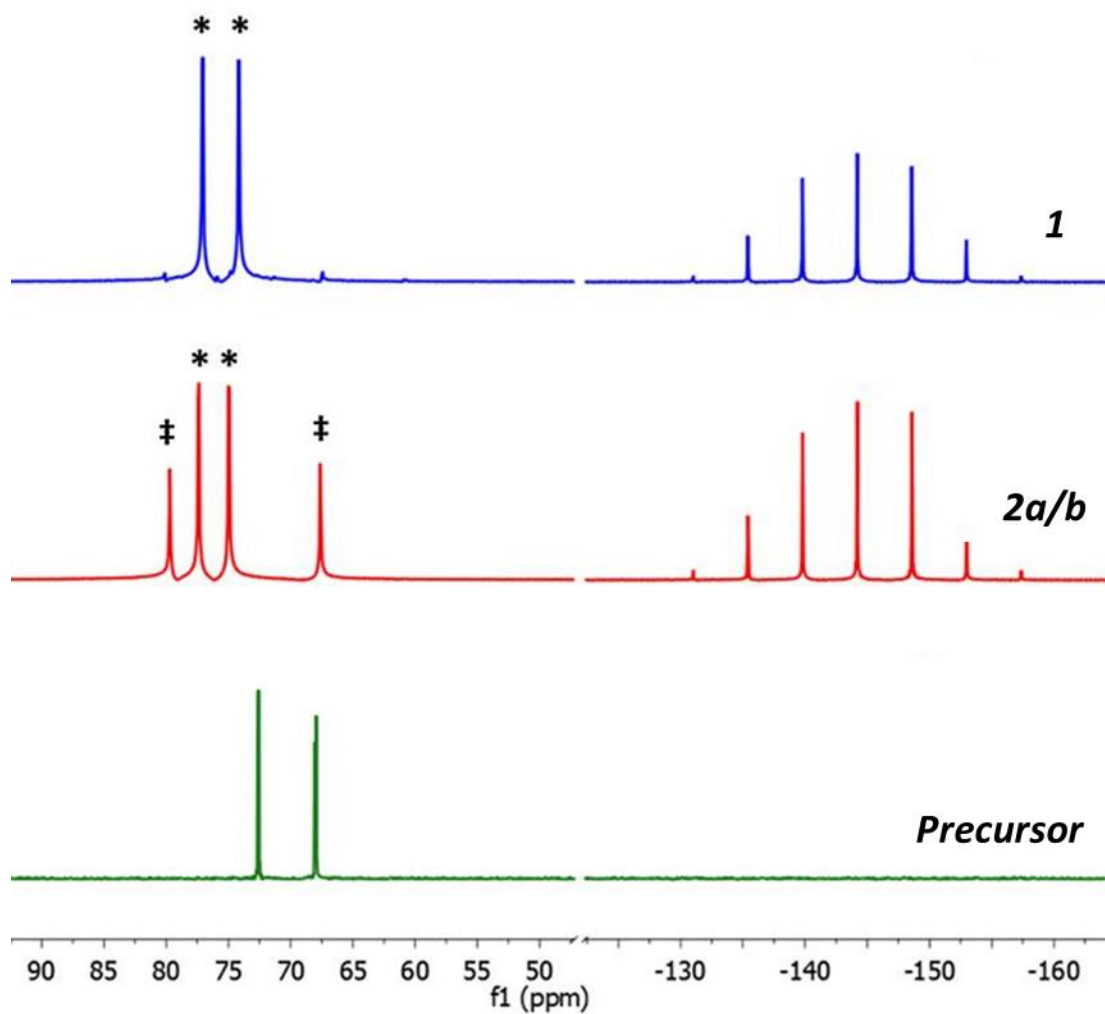

**Figure S9.**  $^{31}\text{P}(^1\text{H})$  NMR spectra of complexes **1**, **2a/2b** and the precursor *cis*- $[\text{RuCl}_2(\text{bipy})(\text{dppen})]$  in DCM (in a capillary tube containing  $\text{D}_2\text{O}$ ), showing the peak displacement of phosphorus atoms of dppen ligand.

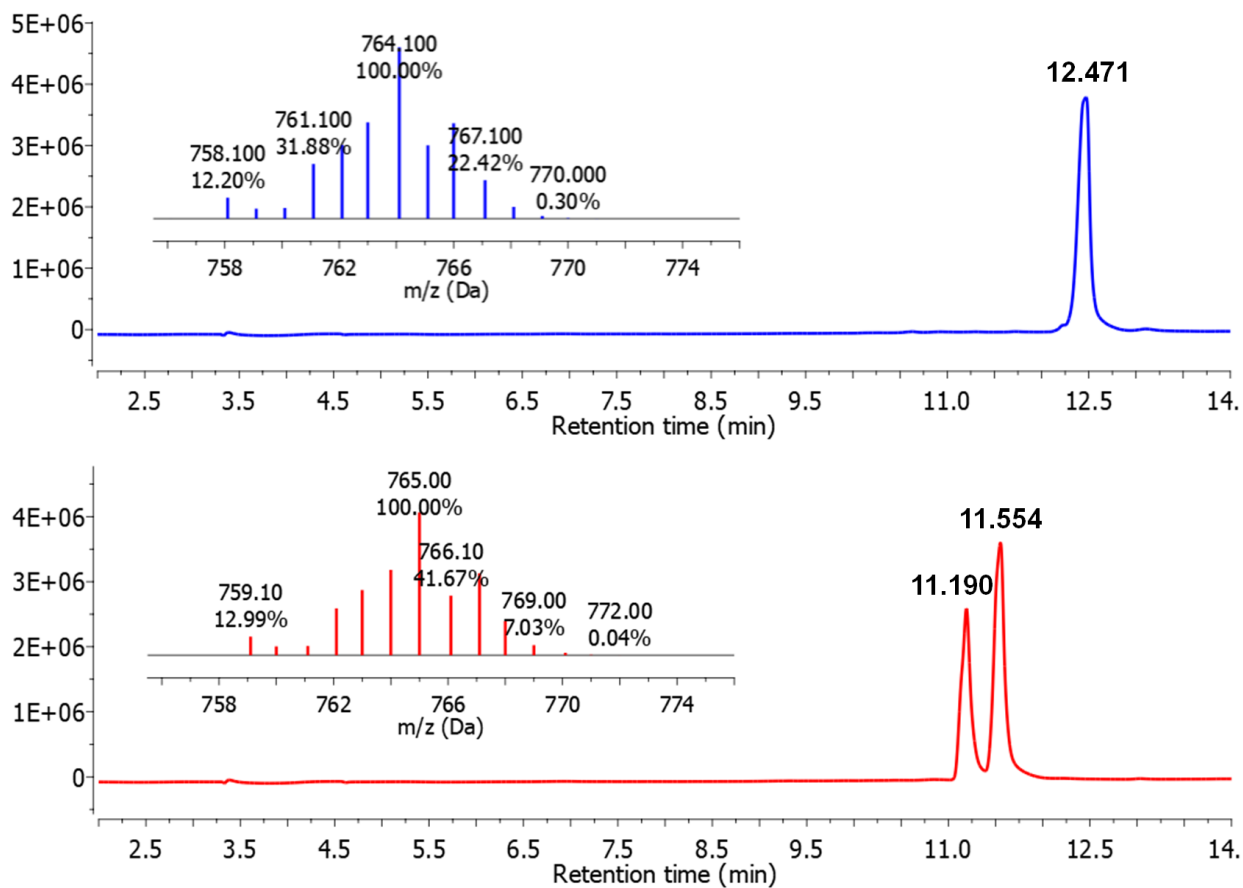

**Figure S10.** LCMS data: chromatogram and mass spectrum of complexes **1** (top) and **2a/2b** (bottom), in MeOH.

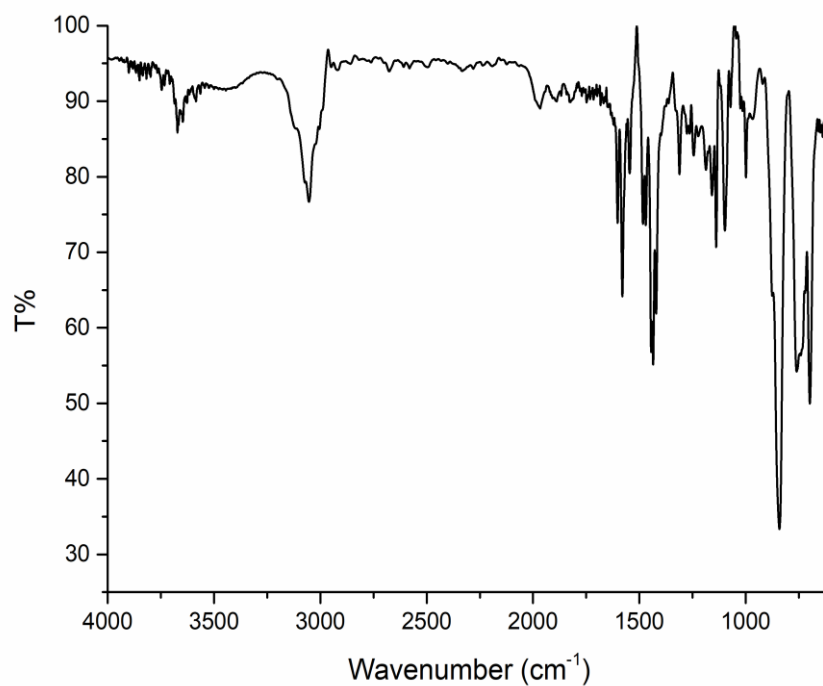

**Figure S11.** Infrared spectrum (diamond/ZnSe ATR) of complex **1**.

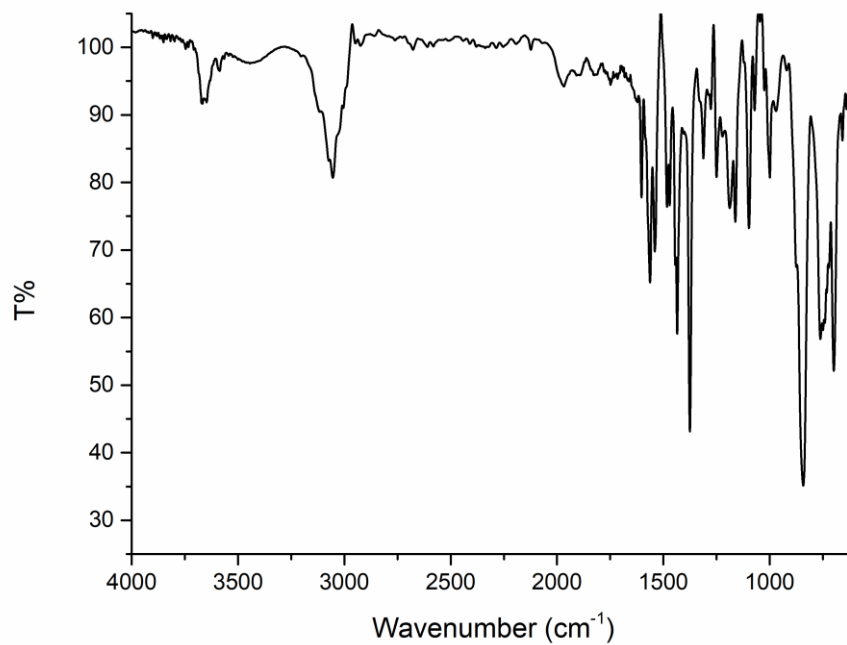

**Figure S12.** Infrared spectrum (diamond/ZnSe ATR) of complex **2a/2b**.

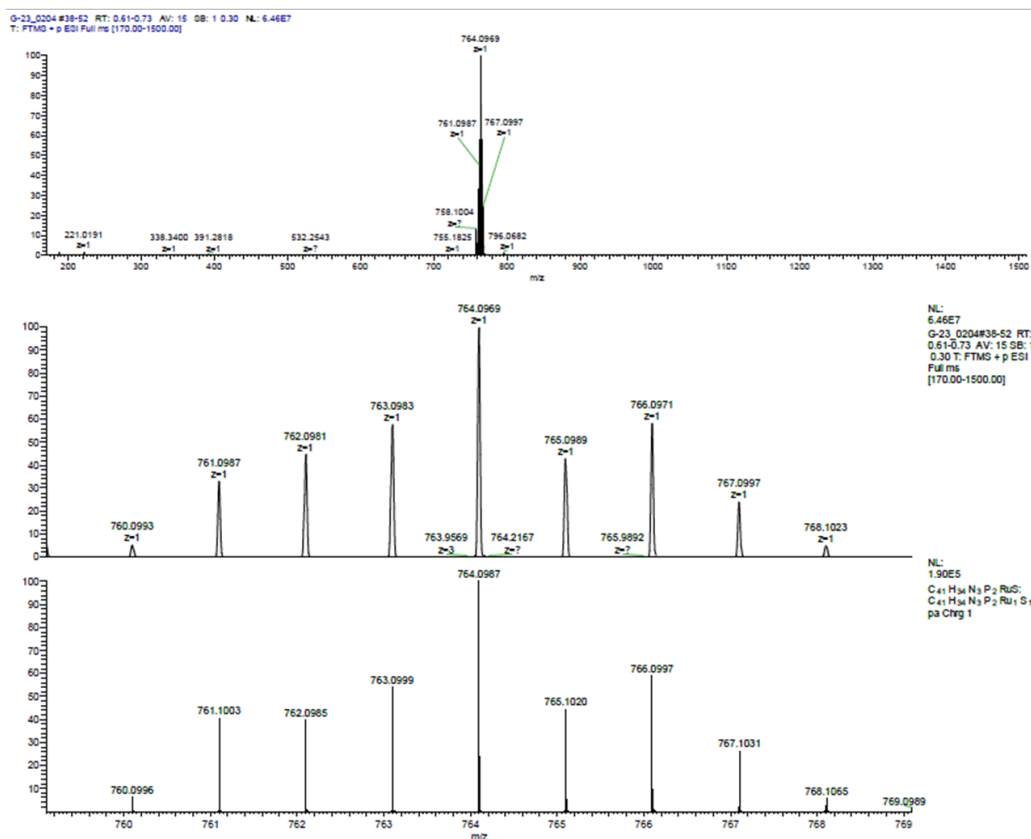

**Figure S13.** ESI-HRMS data: Full-MS (top) and Experimental/Theoretical isotopic pattern (bottom) MS spectra of complex **1** (positive detection mode in MeOH).

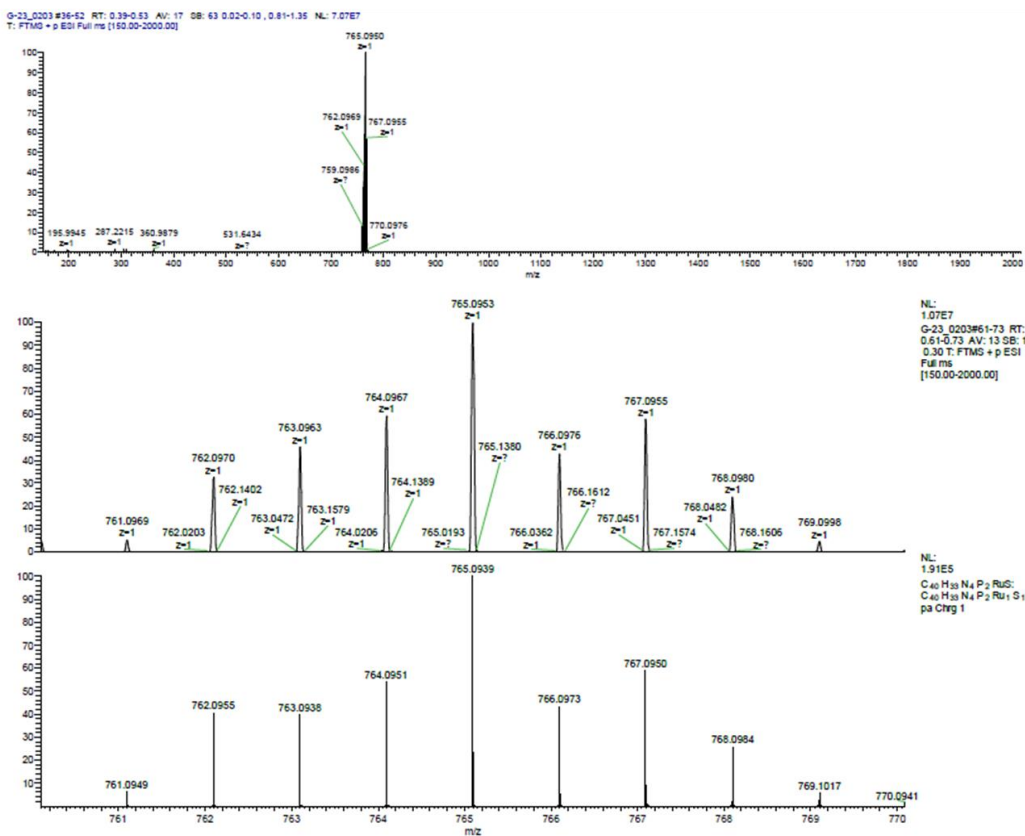

**Figure S14.** ESI-HRMS data: Full-MS (top) and Experimental/Theoretical isotopic pattern (bottom) MS spectra of complex **2a/2b** (positive detection mode in MeOH).

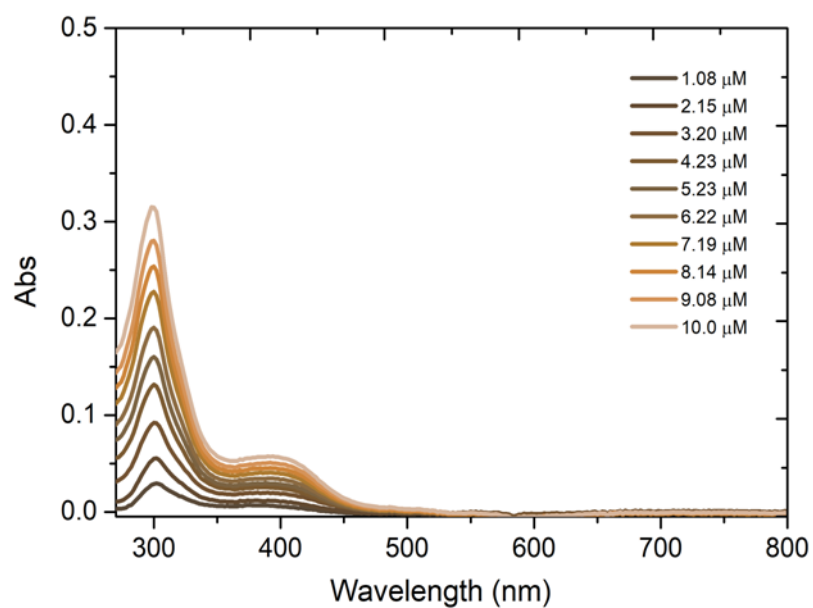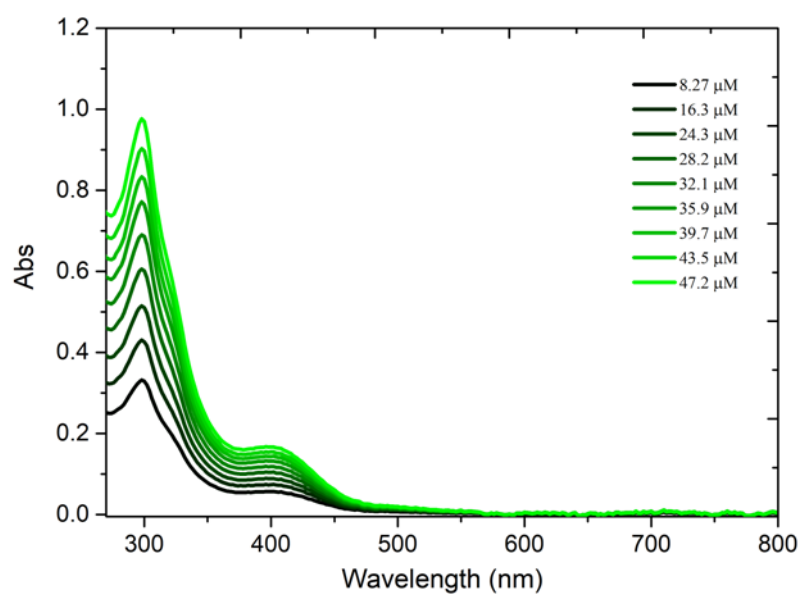

**Figure S15.** Measured UV-Vis spectra of complex **1** (top) and **2a/2b** (bottom) in DMSO.

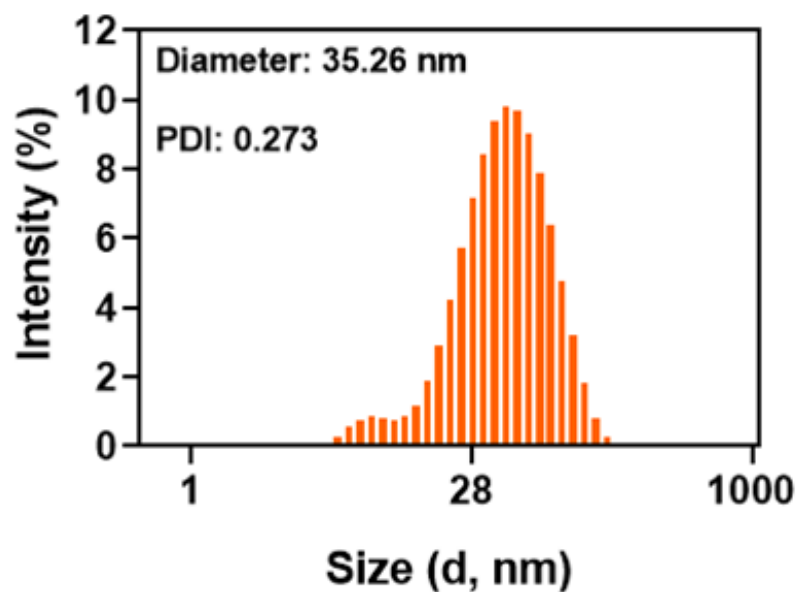

**Figure S16.** Size distribution by the intensity of complex **2a/2b** (20  $\mu$ M) in PBS 10% FBS. Results are presented as mean  $\pm$  SD of three independent replicates.

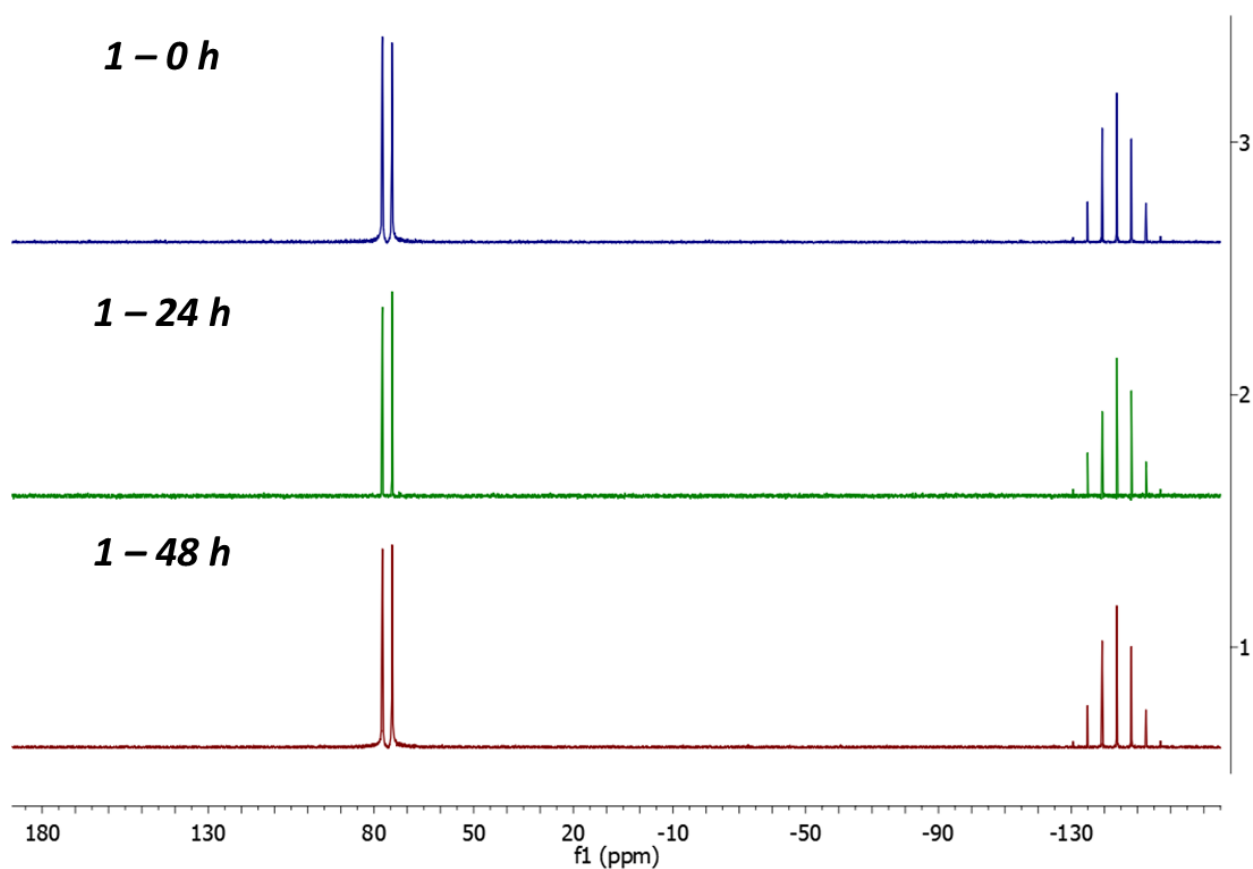

**Figure S17.** Temporal change of the  $^{31}\text{P}$   $\{^1\text{H}\}$  NMR spectra of complex **1** in DMSO/ $\text{D}_2\text{O}$  during 48 h, at 298 K.



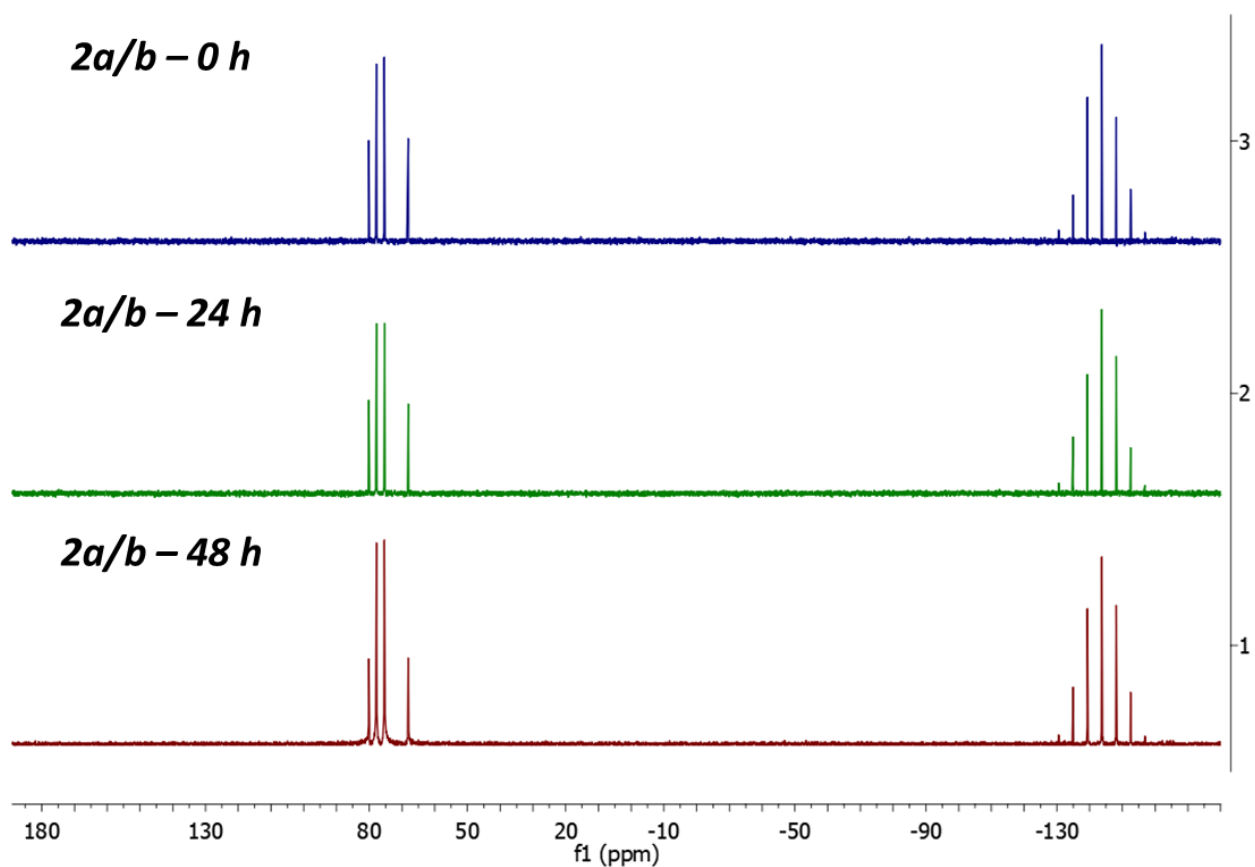

**Figure S18.** Temporal change of the  $^{31}\text{P}$   $\{^1\text{H}\}$  NMR spectra of complex **2a/2b** in DMSO/ $\text{D}_2\text{O}$  during 48 h, at 298 K.

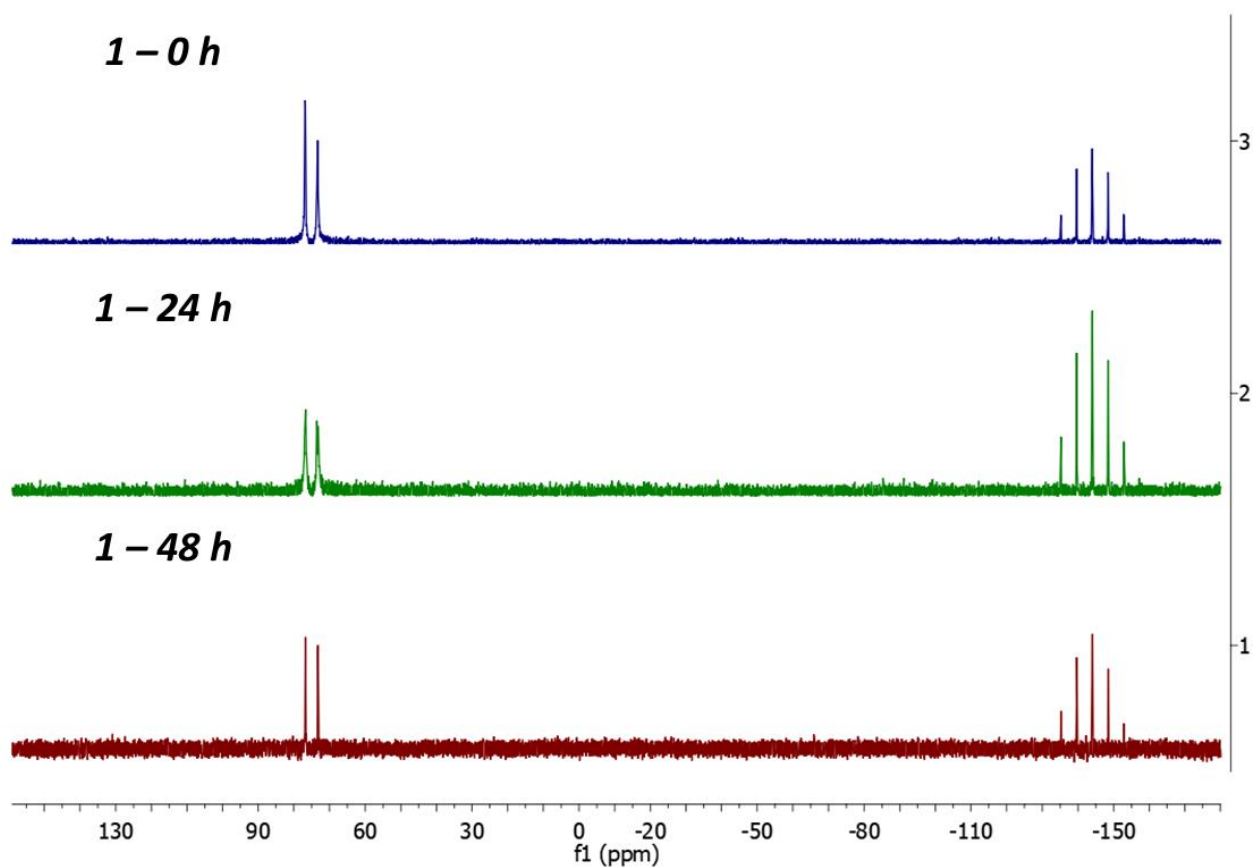

**Figure S19.** Temporal change of the  $^{31}\text{P}$   $\{^1\text{H}\}$  NMR spectra of complex **1** in DMEM (supplemented with 10% fetal bovine serum, 2 mM L-glutamine and 100 U·mL<sup>-1</sup> of penicillin-streptomycin mixture) containing 30% DMSO during 48 h, at 298 K.

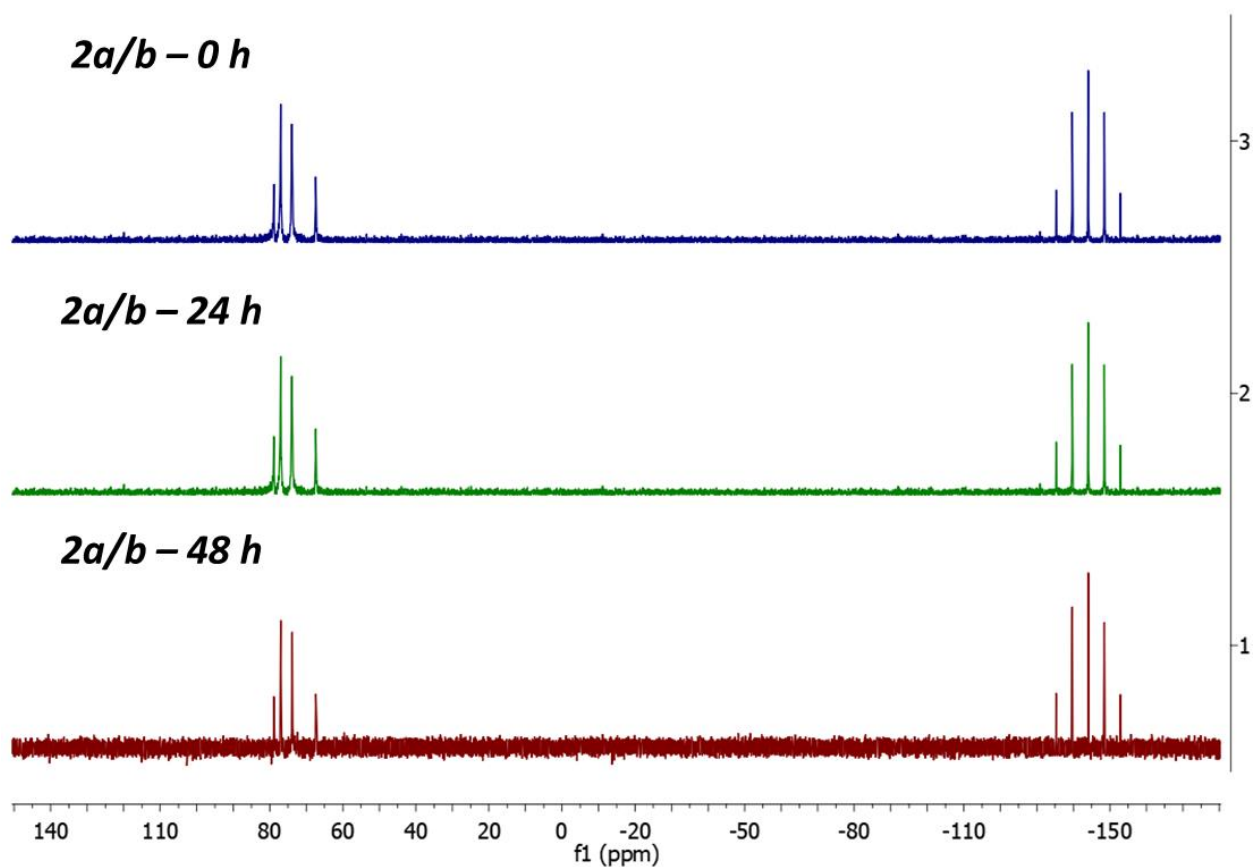

**Figure S20.** Temporal change of the  $^{31}\text{P}$   $\{^1\text{H}\}$  NMR spectra of complex **2a/2b** in DMEM (supplemented with 10% fetal bovine serum, 2 mM L-glutamine and  $100 \text{ U}\cdot\text{mL}^{-1}$  of penicillin-streptomycin mixture) containing 30% DMSO during 48 h, at 298 K.

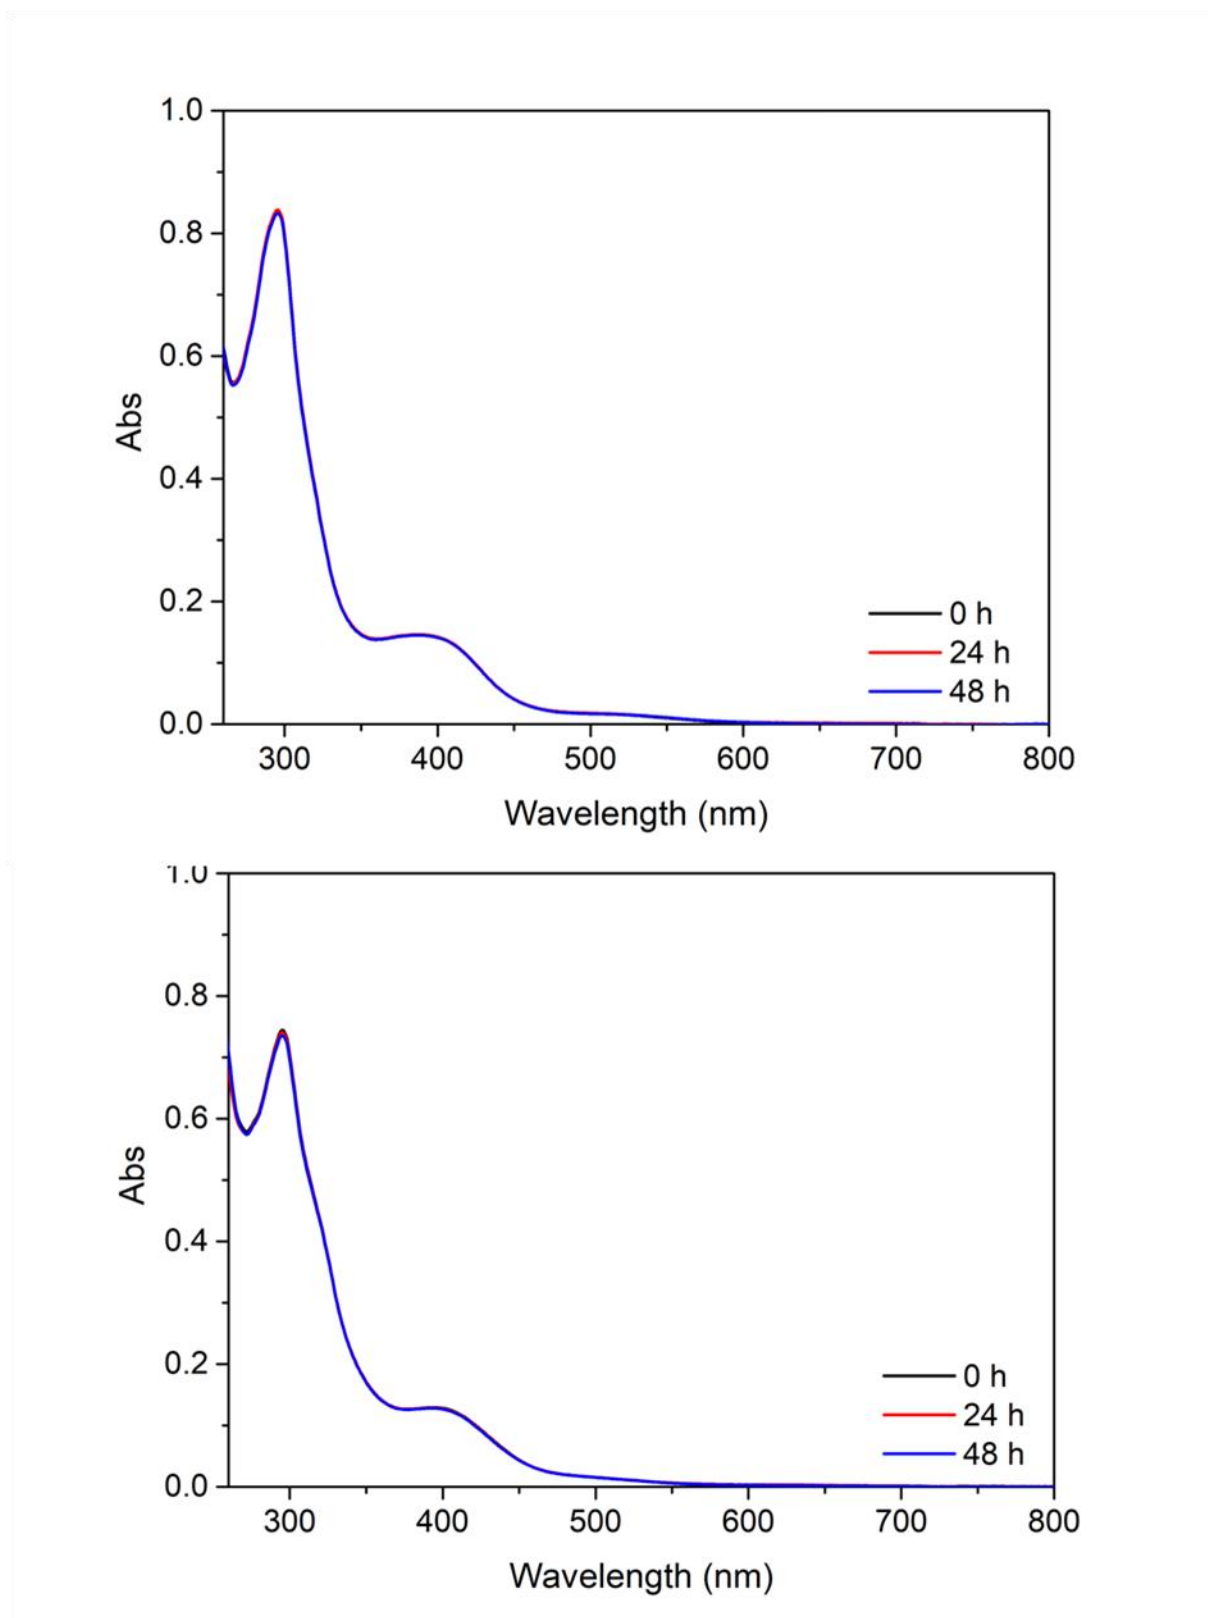

**Figure S21.** Temporal change of the UV-Vis spectra for 48 h of complexes **1** (top) and **2a/2b** (bottom) in DMSO.

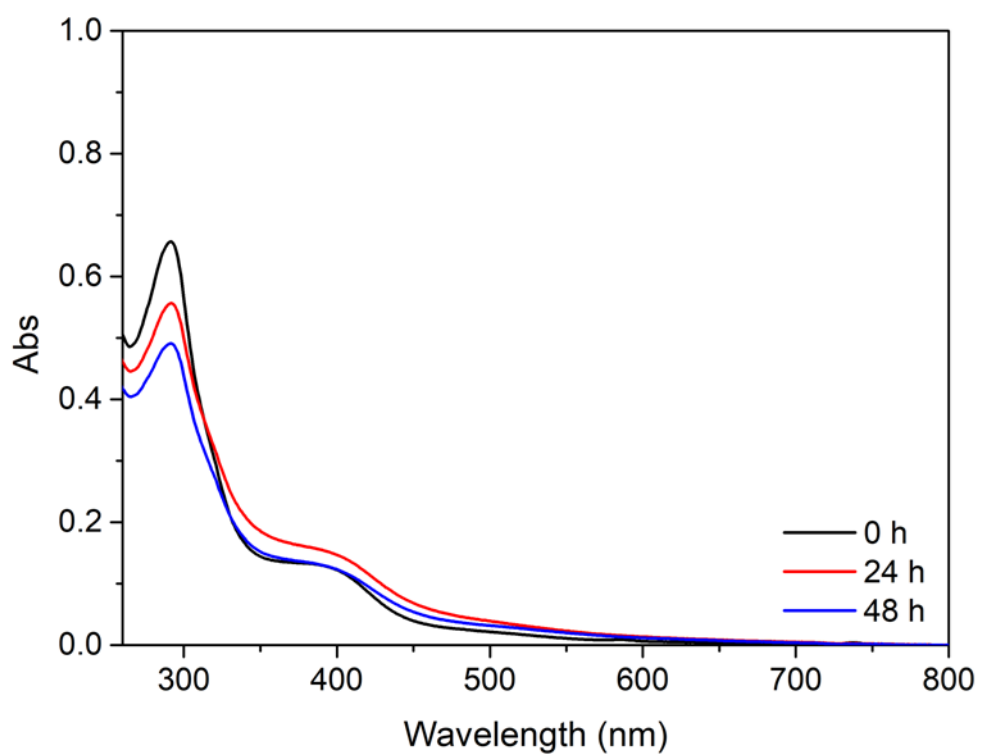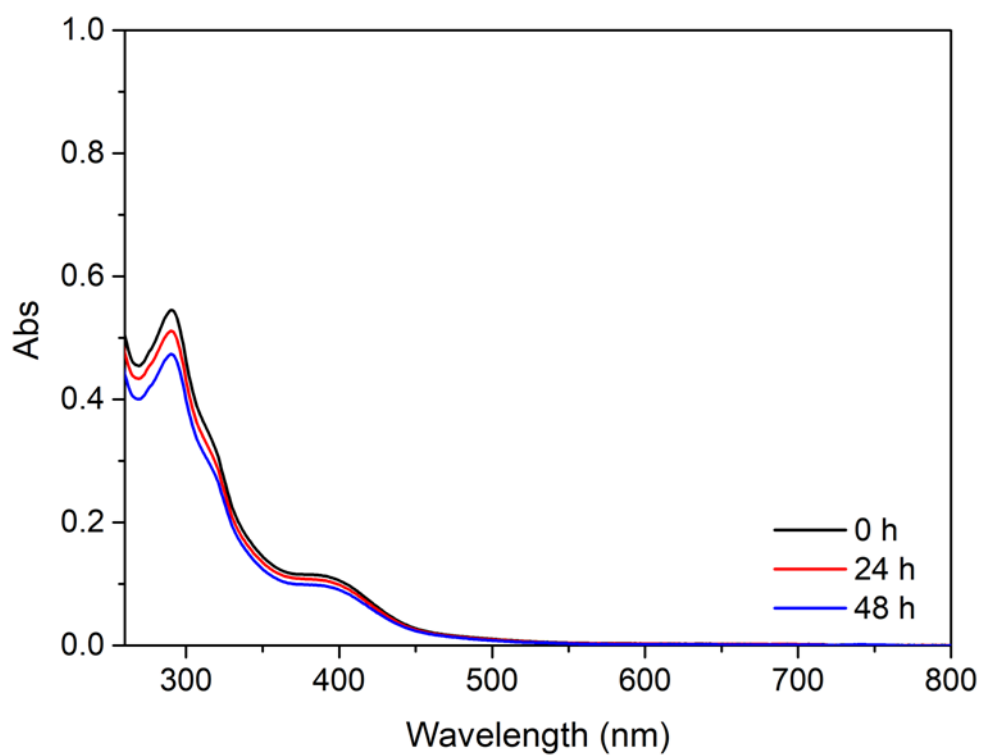

**Figure S22.** Temporal change of the UV-Vis spectra for 48 h of complexes **1** (top) and **2a/2b** (bottom) in PBS.

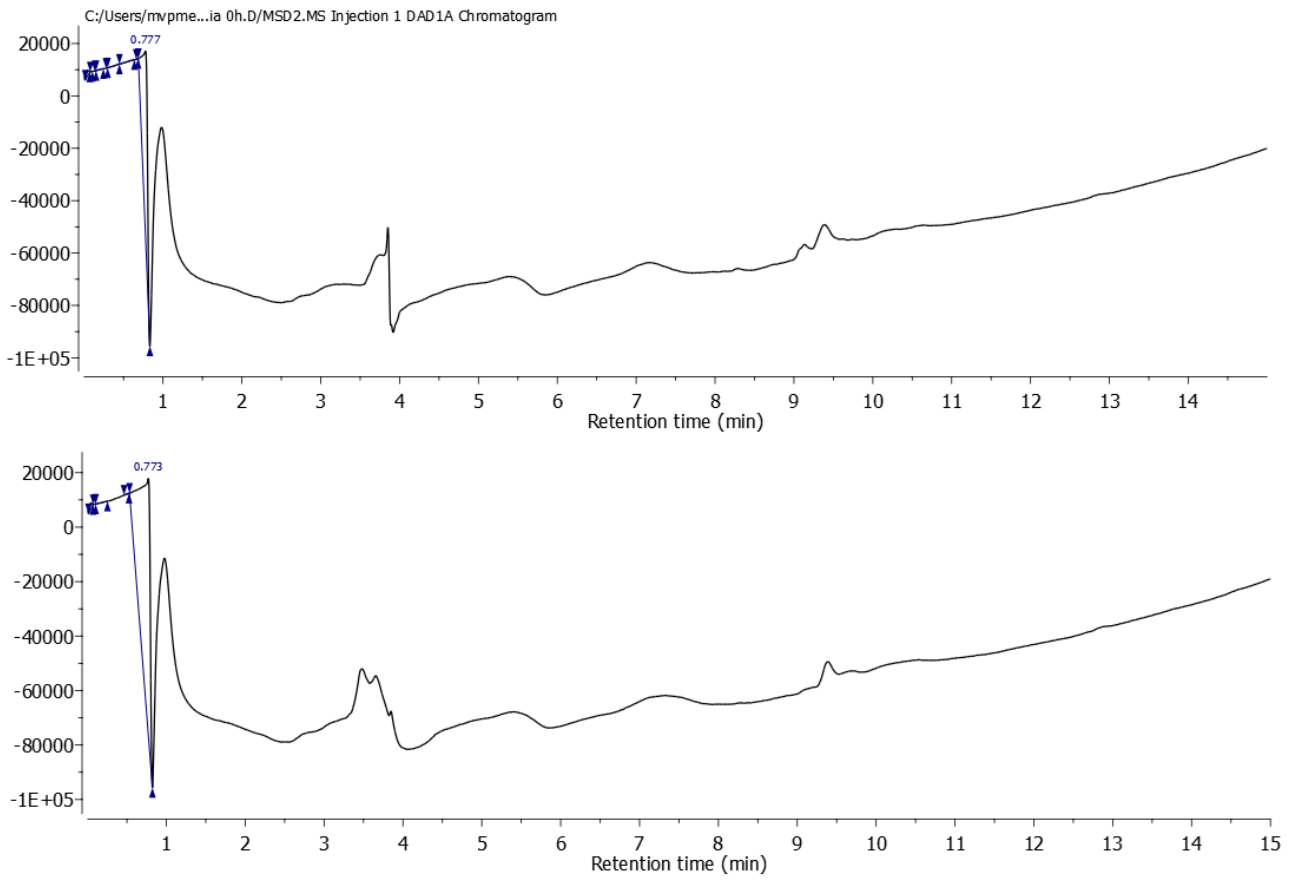

**Figure S23.** Reversed-phase HPLC traces of cell culture medium/DMSO (DMEM supplemented with 10% fetal bovine serum, 2 mM L-glutamine and 100 U·mL<sup>-1</sup> of penicillin-streptomycin mixture) at 250 nm for 0 h and 48 h.

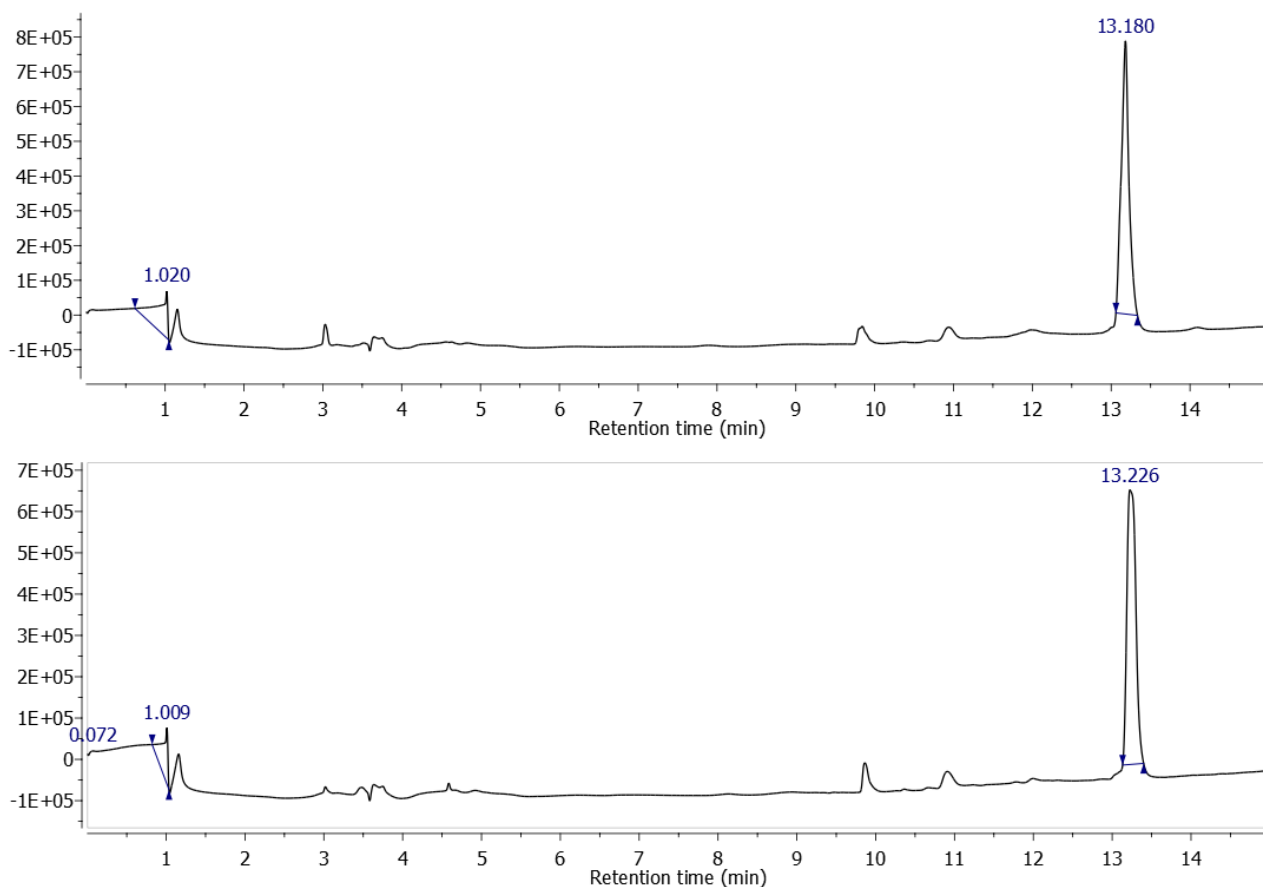

**Figure S24.** Reversed-phase HPLC traces of complex **1** at 250 nm for 0 h and 48 h in cell culture medium/DMSO (DMEM supplemented with 10% fetal bovine serum, 2 mM L-glutamine and 100 U·mL<sup>-1</sup> of penicillin-streptomycin mixture).

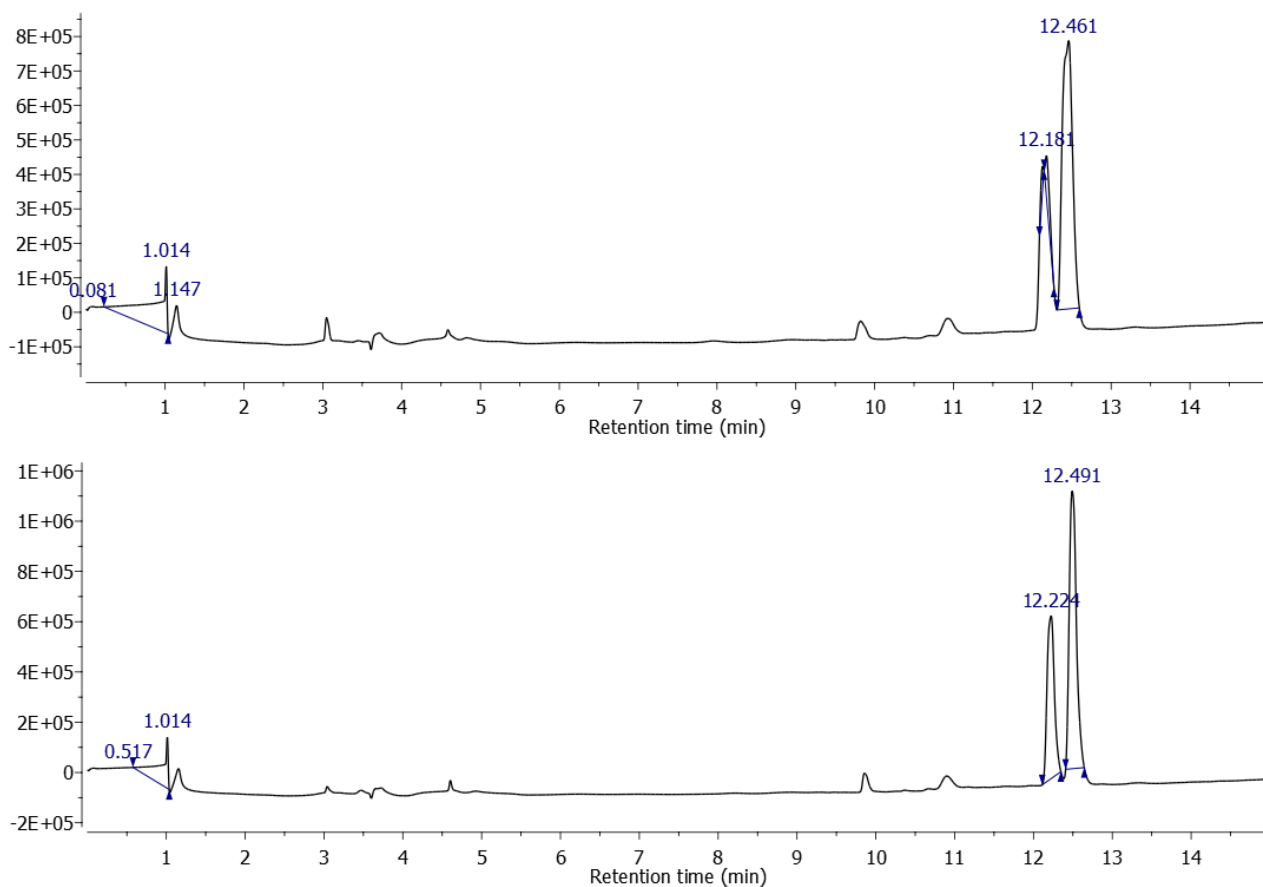

**Figure S25.** Reversed-phase HPLC traces of complex **2a/2b** at 250 nm for 0 h and 48 h in cell culture medium/DMSO (DMEM supplemented with 10% fetal bovine serum, 2 mM L-glutamine and 100 U·mL<sup>-1</sup> of penicillin-streptomycin mixture).



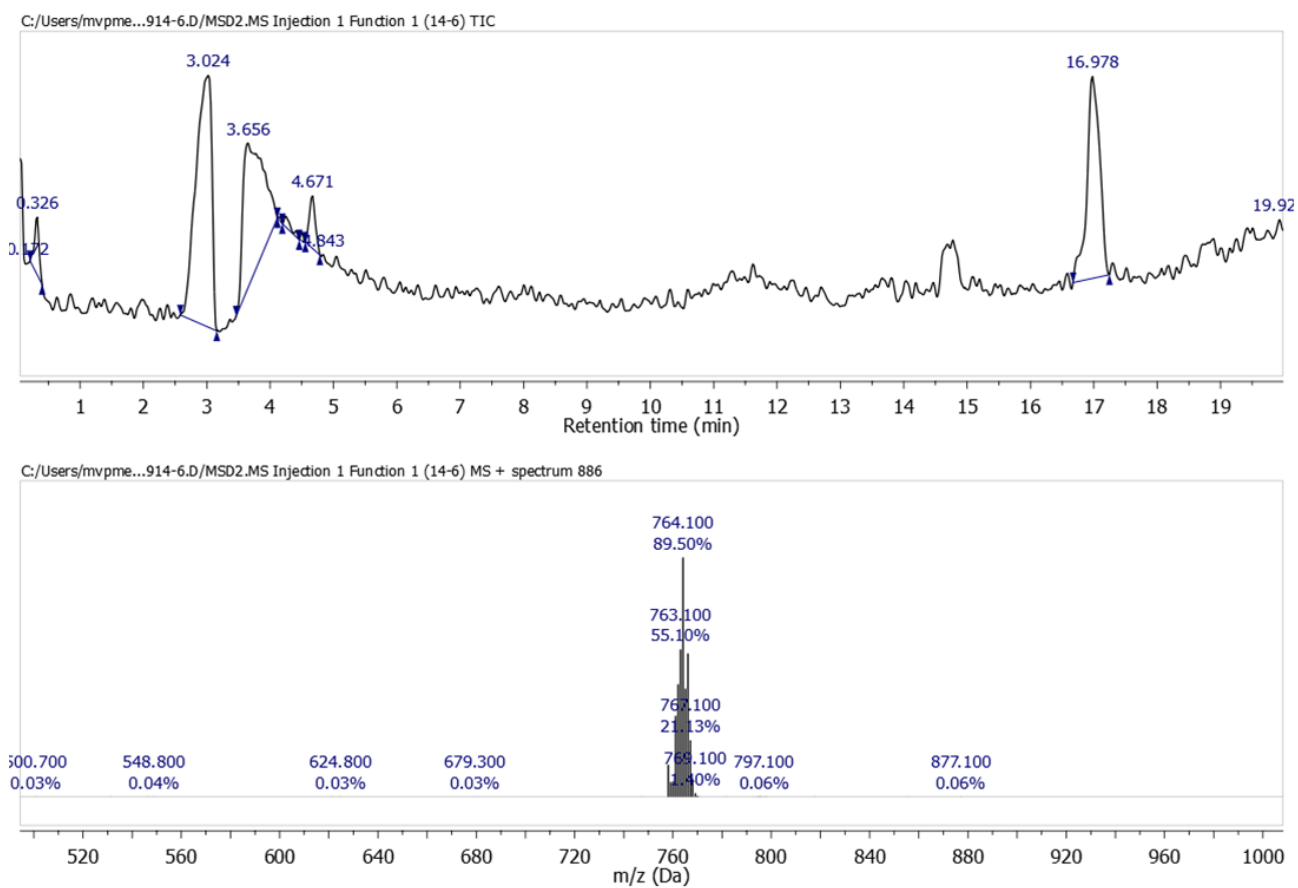

**Figure S26.** LCMS data: Total ion current (TIC) chromatogram and ESI-MS of complex **1** in PBS/MeOH.

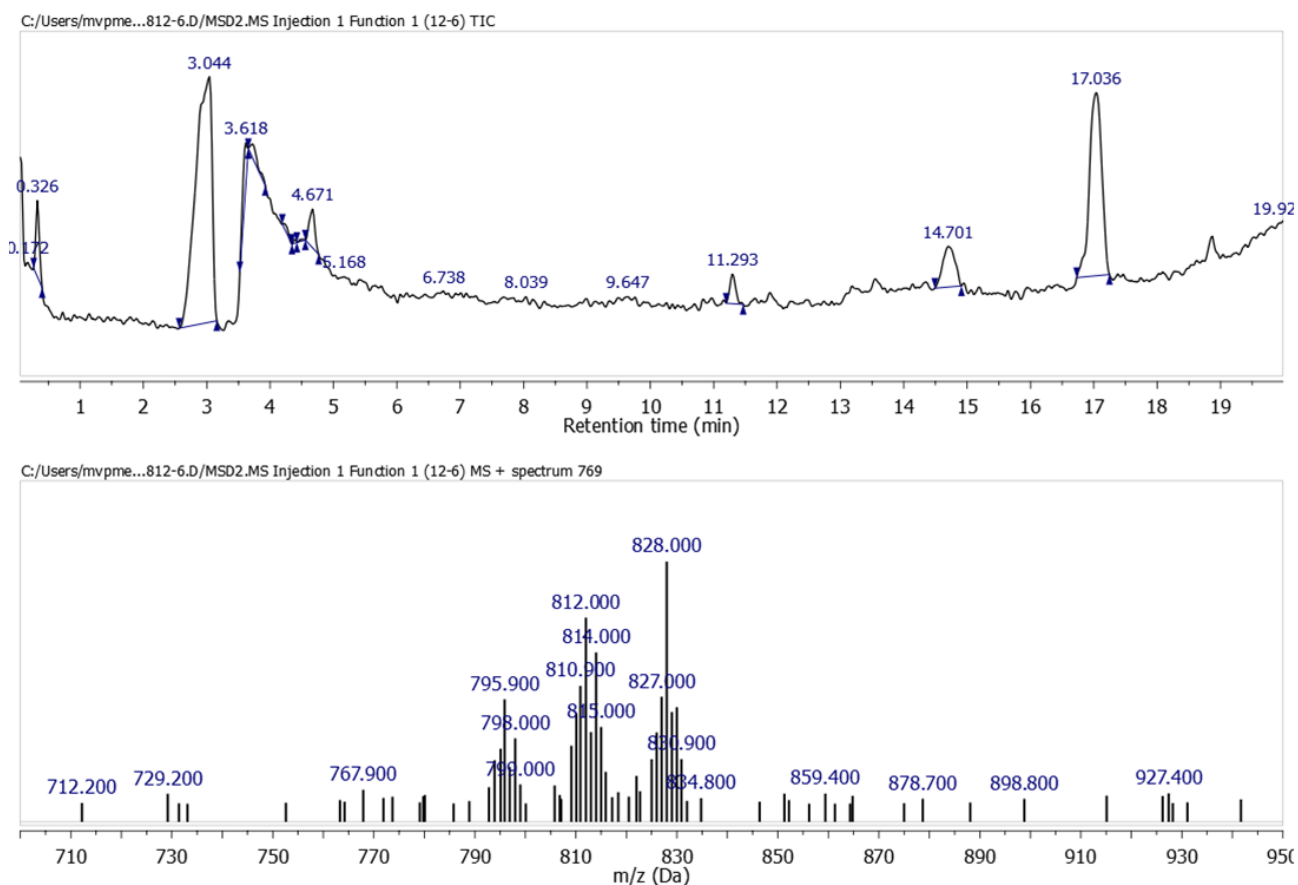

**Figure S27.** LCMS data: Total ion current (TIC) chromatogram and ESI-MS of complex **1** containing Human Liver Microsomes/NADPH in PBS/MeOH after 6 h incubation.

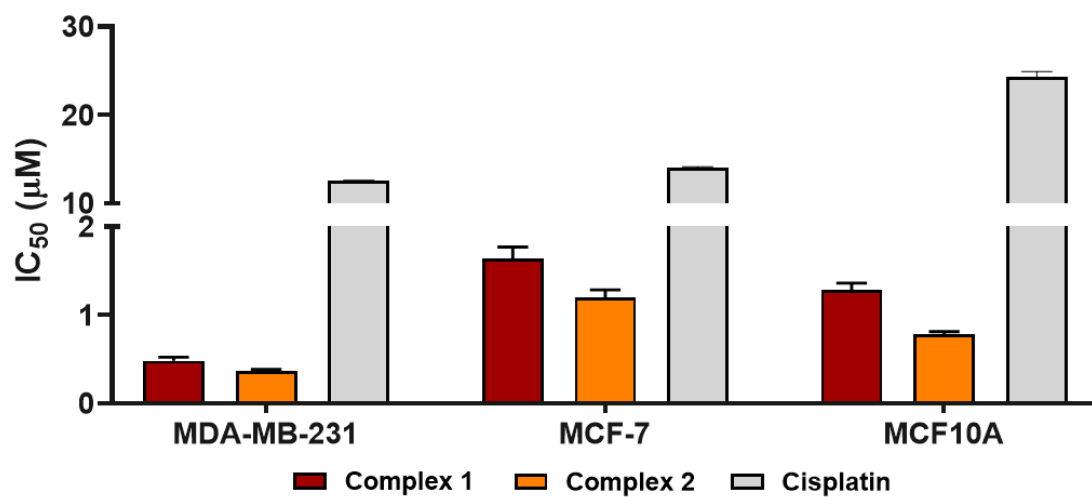

**Figure S28.** Cytotoxicity ( $IC_{50}$ ,  $\mu\text{M}$ ) of complexes **1** and **2a/2b**, and cisplatin against MDA-MB-231 and MCF-7 cancer cells and MCF-10A non-cancerous cells after treatment during 48 h. Data are presented as mean  $\pm$  SD of three independent replicates.

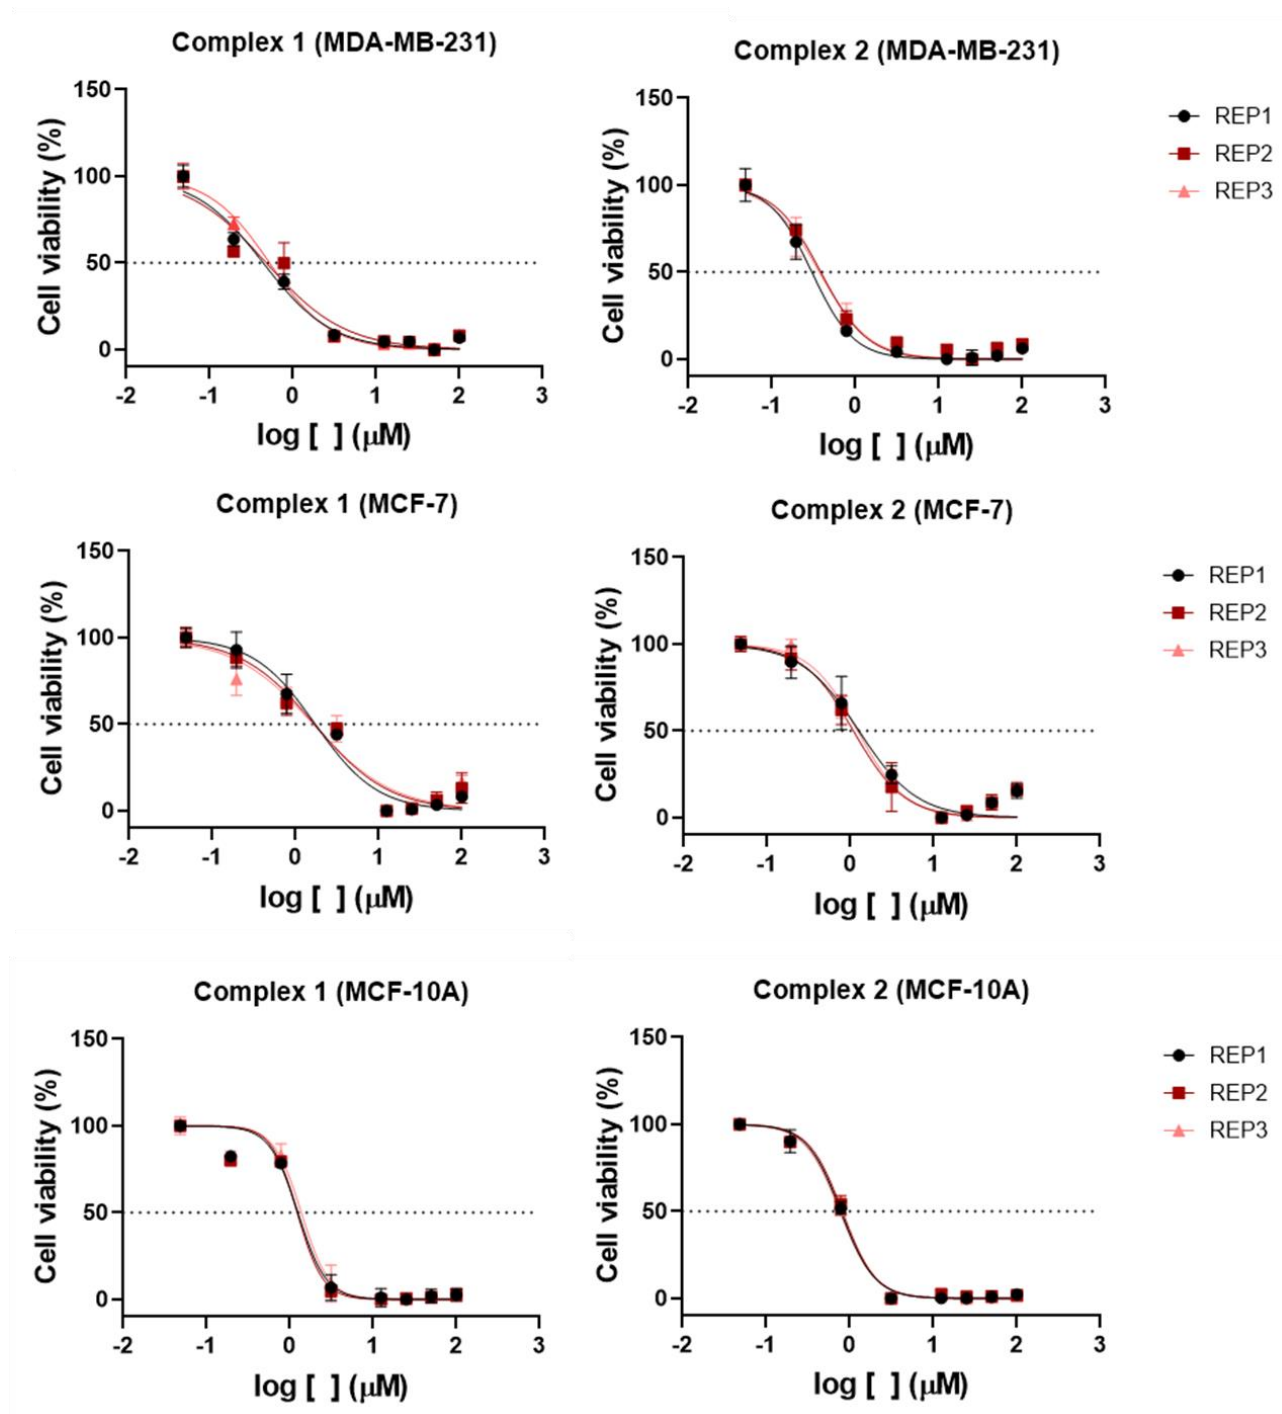

**Figure S29.** Fluorometric cell viability assay of complexes **1** and **2a/2b** in human breast cancer cells MDA-MB-231 and MCF-7, and non-cancer breast cells MCF-10A after treatment for 48h.

**Table S1.** The integrated areas of 11.19 and 11.55 min in Figure S10.

| Peak # | RetTime [min] | Type | Width [min] | Area [mAU*s] | Height [mAU] | Area %  |
|--------|---------------|------|-------------|--------------|--------------|---------|
| 1      | 0.041         | BB   | 0.0380      | 9.12494      | 3.54743      | 0.0373  |
| 2      | 0.920         | BB   | 0.2286      | 1064.44067   | 55.79627     | 4.3457  |
| 3      | 1.080         | BB   | 0.2116      | 635.57629    | 40.16103     | 2.5948  |
| 4      | 2.946         | BB   | 0.4987      | 344.54556    | 8.14271      | 1.4066  |
| 5      | 3.381         | BB   | 0.1202      | 220.91144    | 26.25071     | 0.9019  |
| 6      | 4.528         | BB   | 0.3334      | 267.36765    | 9.46937      | 1.0916  |
| 7      | 6.935         | BB   | 0.2512      | 52.21876     | 2.45492      | 0.2132  |
| 8      | 9.325         | BB   | 0.1804      | 15.04881     | 1.10810      | 0.0614  |
| 9      | 10.426        | BB   | 0.1861      | 17.01336     | 1.14689      | 0.0695  |
| 10     | 10.848        | BB   | 0.1486      | 43.46539     | 4.00615      | 0.1775  |
| 11     | 11.192        | BB   | 0.0981      | 8657.21484   | 1229.84729   | 35.3442 |
| 12     | 11.552        | BB   | 0.1186      | 1.31194e4    | 1689.88147   | 53.5616 |
| 13     | 12.210        | BB   | 0.1145      | 10.13565     | 1.23838      | 0.0414  |
| 14     | 13.029        | BB   | 0.1201      | 37.57490     | 4.46939      | 0.1534  |

**Table S2.** Crystal data and structure refinement for complex **2b**.

|                                             |                                                                                  |
|---------------------------------------------|----------------------------------------------------------------------------------|
| Empirical formula                           | C <sub>40</sub> H <sub>33</sub> F <sub>6</sub> N <sub>4</sub> P <sub>3</sub> RuS |
| Formula weight                              | 909.74                                                                           |
| Temperature/K                               | 160.0(1)                                                                         |
| Crystal system                              | monoclinic                                                                       |
| Space group                                 | P2 <sub>1</sub> /c                                                               |
| a/Å                                         | 8.66950(10)                                                                      |
| b/Å                                         | 15.33050(10)                                                                     |
| c/Å                                         | 29.1301(2)                                                                       |
| α/°                                         | 90                                                                               |
| β/°                                         | 91.9510(10)                                                                      |
| γ/°                                         | 90                                                                               |
| Volume/Å <sup>3</sup>                       | 3869.37(6)                                                                       |
| Z                                           | 4                                                                                |
| ρ <sub>calc</sub> /g/cm <sup>3</sup>        | 1.562                                                                            |
| μ/mm <sup>-1</sup>                          | 5.521                                                                            |
| F(000)                                      | 1840.0                                                                           |
| Crystal size/mm <sup>3</sup>                | 0.13 × 0.03 × 0.02                                                               |
| Radiation                                   | Cu Kα (λ = 1.54184)                                                              |
| 2θ range for data collection/°              | 6.072 to 154.732                                                                 |
| Index ranges                                | -10 ≤ h ≤ 10, -19 ≤ k ≤ 14, -36 ≤ l ≤ 28                                         |
| Reflections collected                       | 46742                                                                            |
| Independent reflections                     | 8175 [R <sub>int</sub> = 0.0281, R <sub>sigma</sub> = 0.0194]                    |
| Data/restraints/parameters                  | 8175/0/496                                                                       |
| Goodness-of-fit on F <sup>2</sup>           | 1.057                                                                            |
| Final R indexes [I ≥ 2σ (I)]                | R <sub>1</sub> = 0.0236, wR <sub>2</sub> = 0.0614                                |
| Final R indexes [all data]                  | R <sub>1</sub> = 0.0252, wR <sub>2</sub> = 0.0622                                |
| Largest diff. peak/hole / e Å <sup>-3</sup> | 0.45/-0.56                                                                       |

**Table S3.** Bond Lengths for complex **2b**.

| Atom | Atom | Length/Å   | Atom | Atom | Length/Å   |
|------|------|------------|------|------|------------|
| C1   | C2   | 1.385(3)   | C24  | C25  | 1.377(3)   |
| C1   | N1   | 1.337(2)   | C25  | C26  | 1.383(3)   |
| C2   | C3   | 1.379(4)   | C27  | C28  | 1.322(2)   |
| C3   | N2   | 1.338(3)   | C27  | P1   | 1.8132(17) |
| C4   | N1   | 1.364(2)   | C28  | P2   | 1.8142(17) |
| C4   | N2   | 1.332(2)   | C29  | C30  | 1.395(2)   |
| C4   | S1   | 1.7296(19) | C29  | C34  | 1.385(3)   |
| C5   | C6   | 1.382(2)   | C29  | P2   | 1.8306(16) |
| C5   | N3   | 1.347(2)   | C30  | C31  | 1.395(3)   |
| C6   | C7   | 1.375(3)   | C31  | C32  | 1.372(3)   |
| C7   | C8   | 1.381(3)   | C32  | C33  | 1.385(3)   |
| C8   | C9   | 1.390(2)   | C33  | C34  | 1.394(3)   |
| C9   | C10  | 1.472(2)   | C35  | C36  | 1.388(3)   |
| C9   | N3   | 1.352(2)   | C35  | C40  | 1.387(3)   |
| C10  | C11  | 1.391(2)   | C35  | P2   | 1.8317(18) |
| C10  | N4   | 1.365(2)   | C36  | C37  | 1.388(3)   |
| C11  | C12  | 1.382(3)   | C37  | C38  | 1.376(3)   |
| C12  | C13  | 1.379(3)   | C38  | C39  | 1.384(4)   |
| C13  | C14  | 1.383(3)   | C39  | C40  | 1.387(3)   |
| C14  | N4   | 1.347(2)   | N1   | Ru1  | 2.0817(14) |
| C15  | C16  | 1.397(2)   | N3   | Ru1  | 2.1219(13) |
| C15  | C20  | 1.393(3)   | N4   | Ru1  | 2.0898(13) |
| C15  | P1   | 1.8246(17) | P1   | Ru1  | 2.2736(4)  |
| C16  | C17  | 1.389(3)   | P2   | Ru1  | 2.2813(4)  |
| C17  | C18  | 1.375(3)   | Ru1  | S1   | 2.4602(4)  |
| C18  | C19  | 1.376(3)   | F1   | P3   | 1.5951(14) |
| C19  | C20  | 1.390(3)   | F2   | P3   | 1.6061(16) |

| Atom | Atom | Length/Å   | Atom | Atom | Length/Å   |
|------|------|------------|------|------|------------|
| C21  | C22  | 1.395(2)   | F3   | P3   | 1.6095(15) |
| C21  | C26  | 1.396(2)   | F4   | P3   | 1.5843(16) |
| C21  | P1   | 1.8273(18) | F5   | P3   | 1.5997(13) |
| C22  | C23  | 1.384(3)   | F6   | P3   | 1.5917(16) |
| C23  | C24  | 1.385(3)   |      |      |            |

**Table S4.** Bond Angles for complex **2b**.

| Atom | Atom | Atom | Angle/°    | Atom | Atom | Atom | Angle/°    |
|------|------|------|------------|------|------|------|------------|
| N1   | C1   | C2   | 120.5(2)   | C1   | N1   | C4   | 117.98(16) |
| C3   | C2   | C1   | 117.0(2)   | C1   | N1   | Ru1  | 139.26(14) |
| N2   | C3   | C2   | 124.07(19) | C4   | N1   | Ru1  | 102.45(11) |
| N1   | C4   | S1   | 110.34(12) | C4   | N2   | C3   | 115.30(19) |
| N2   | C4   | N1   | 125.09(17) | C5   | N3   | C9   | 118.47(14) |
| N2   | C4   | S1   | 124.56(15) | C5   | N3   | Ru1  | 126.10(12) |
| N3   | C5   | C6   | 122.92(17) | C9   | N3   | Ru1  | 115.42(10) |
| C7   | C6   | C5   | 118.31(17) | C10  | N4   | Ru1  | 115.56(10) |
| C6   | C7   | C8   | 119.79(17) | C14  | N4   | C10  | 117.41(14) |
| C7   | C8   | C9   | 119.18(17) | C14  | N4   | Ru1  | 127.01(11) |
| C8   | C9   | C10  | 123.50(16) | C15  | P1   | C21  | 105.46(8)  |
| N3   | C9   | C8   | 121.31(15) | C15  | P1   | Ru1  | 118.28(6)  |
| N3   | C9   | C10  | 115.17(14) | C21  | P1   | Ru1  | 117.69(6)  |
| C11  | C10  | C9   | 122.25(15) | C27  | P1   | C15  | 103.12(8)  |
| N4   | C10  | C9   | 115.98(14) | C27  | P1   | C21  | 100.77(8)  |
| N4   | C10  | C11  | 121.71(15) | C27  | P1   | Ru1  | 109.20(6)  |
| C12  | C11  | C10  | 119.66(17) | C28  | P2   | C29  | 103.60(8)  |
| C13  | C12  | C11  | 118.86(17) | C28  | P2   | C35  | 102.24(8)  |
| C12  | C13  | C14  | 118.99(16) | C28  | P2   | Ru1  | 109.14(5)  |



| <b>Atom Atom Atom Angle/°</b> |     |     |            | <b>Atom Atom Atom Angle/°</b> |     |     |             |
|-------------------------------|-----|-----|------------|-------------------------------|-----|-----|-------------|
| N4                            | C14 | C13 | 123.29(16) | C29                           | P2  | C35 | 101.72(8)   |
| C16                           | C15 | P1  | 119.44(14) | C29                           | P2  | Ru1 | 122.90(6)   |
| C20                           | C15 | C16 | 118.87(16) | C35                           | P2  | Ru1 | 114.87(5)   |
| C20                           | C15 | P1  | 121.43(13) | N1                            | Ru1 | N3  | 90.78(5)    |
| C17                           | C16 | C15 | 120.43(18) | N1                            | Ru1 | N4  | 163.18(5)   |
| C18                           | C17 | C16 | 119.90(19) | N1                            | Ru1 | P1  | 103.36(4)   |
| C17                           | C18 | C19 | 120.45(19) | N1                            | Ru1 | P2  | 90.09(4)    |
| C18                           | C19 | C20 | 120.2(2)   | N1                            | Ru1 | S1  | 67.66(4)    |
| C19                           | C20 | C15 | 120.14(18) | N3                            | Ru1 | P1  | 95.20(4)    |
| C22                           | C21 | C26 | 118.51(17) | N3                            | Ru1 | P2  | 178.83(4)   |
| C22                           | C21 | P1  | 119.45(13) | N3                            | Ru1 | S1  | 88.17(4)    |
| C26                           | C21 | P1  | 121.94(14) | N4                            | Ru1 | N3  | 77.80(5)    |
| C23                           | C22 | C21 | 120.58(17) | N4                            | Ru1 | P1  | 90.09(4)    |
| C22                           | C23 | C24 | 120.19(19) | N4                            | Ru1 | P2  | 101.52(4)   |
| C25                           | C24 | C23 | 119.77(19) | N4                            | Ru1 | S1  | 99.30(4)    |
| C24                           | C25 | C26 | 120.42(18) | P1                            | Ru1 | P2  | 83.836(14)  |
| C25                           | C26 | C21 | 120.54(18) | P1                            | Ru1 | S1  | 170.509(15) |
| C28                           | C27 | P1  | 118.57(13) | P2                            | Ru1 | S1  | 92.882(14)  |
| C27                           | C28 | P2  | 118.07(13) | C4                            | S1  | Ru1 | 78.99(6)    |
| C30                           | C29 | P2  | 121.51(14) | F1                            | P3  | F2  | 89.67(9)    |
| C34                           | C29 | C30 | 119.03(16) | F1                            | P3  | F3  | 178.68(10)  |
| C34                           | C29 | P2  | 119.43(13) | F1                            | P3  | F5  | 89.90(7)    |
| C31                           | C30 | C29 | 120.20(18) | F2                            | P3  | F3  | 89.01(9)    |
| C32                           | C31 | C30 | 120.05(18) | F4                            | P3  | F1  | 91.08(9)    |
| C31                           | C32 | C33 | 120.48(18) | F4                            | P3  | F2  | 178.74(10)  |
| C32                           | C33 | C34 | 119.6(2)   | F4                            | P3  | F3  | 90.24(9)    |
| C29                           | C34 | C33 | 120.64(18) | F4                            | P3  | F5  | 90.11(8)    |
| C36                           | C35 | P2  | 120.26(14) | F4                            | P3  | F6  | 90.40(10)   |

| Atom Atom Atom Angle/° |     |     |            | Atom Atom Atom Angle/° |    |    |           |
|------------------------|-----|-----|------------|------------------------|----|----|-----------|
| C40                    | C35 | C36 | 119.22(18) | F5                     | P3 | F2 | 88.88(8)  |
| C40                    | C35 | P2  | 120.24(14) | F5                     | P3 | F3 | 90.09(8)  |
| C35                    | C36 | C37 | 120.34(19) | F6                     | P3 | F1 | 89.85(9)  |
| C38                    | C37 | C36 | 120.1(2)   | F6                     | P3 | F2 | 90.61(10) |
| C37                    | C38 | C39 | 120.1(2)   | F6                     | P3 | F3 | 90.16(9)  |
| C38                    | C39 | C40 | 119.9(2)   | F6                     | P3 | F5 | 179.43(9) |
| C35                    | C40 | C39 | 120.3(2)   |                        |    |    |           |

**Table S5.** Areas of complex **1** at 16.98 and 17.00 min in Figure 5 (a and c).

| Time  | Area      | Height   | Width  |
|-------|-----------|----------|--------|
| 16.98 | 279.54761 | 35.66253 | 0.1175 |
| 17.00 | 242.34882 | 29.76770 | 0.1170 |
